# Supplementary material for: Effectiveness of Air Filters in Allergic Rhinitis: A Systematic Review and Meta‐Analysis
Source: Hindawi journal article supplement (doi:10.1155/2024/8847667), 2024-01-01
Supplement: f1 [file 8847667.f1.docx]

# Part 1: Supplementary Tables

## Table S1. PRISMA 2020 Checklist

| **Section and Topic** | **Item #** | **Checklist item** | **Location where item is reported** |
| --- | --- | --- | --- |
| **TITLE** | | |  |
| Title | 1 | Identify the report as a systematic review. | Title |
| **ABSTRACT** | | |  |
| Abstract | 2 | See the PRISMA 2020 for Abstracts checklist. | Abstract |
| **INTRODUCTION** | | |  |
| Rationale | 3 | Describe the rationale for the review in the context of existing knowledge. | Introduction |
| Objectives | 4 | Provide an explicit statement of the objective(s) or question(s) the review addresses. | Introduction |
| **METHODS** | | |  |
| Eligibility criteria | 5 | Specify the inclusion and exclusion criteria for the review and how studies were grouped for the syntheses. | Methods |
| Information sources | 6 | Specify all databases, registers, websites, organisations, reference lists, and other sources searched or consulted to identify studies. Specify the date when each source was last searched or consulted. | Methods |
| Search strategy | 7 | Present the entire search strategies for all databases, registers, and websites, including any filters and limits used. | Methods, Table S2-4 |
| Selection process | 8 | Specify the methods used to decide whether a study met the inclusion criteria of the review, including how many reviewers screened each record and each report retrieved, whether they worked independently, and if applicable, details of automation tools used in the process. | Methods |
| Data collection process | 9 | Specify the methods used to collect data from reports, including how many reviewers collected data from each report, whether they worked independently, any processes for obtaining or confirming data from study investigators, and if applicable, details of automation tools used in the process. | Methods |
| Data items | 10a | List and define all outcomes for which data were sought. Specify whether all results that were compatible with each outcome domain in each study were sought (e.g. for all measures, time points, analyses), and if not, the methods used to decide which results to collect. | Methods |
| 10b | List and define all other variables for which data were sought (e.g. participant and intervention characteristics, funding sources). Describe any assumptions made about any missing or unclear information. | Methods |
| Study risk of bias assessment | 11 | Specify the methods used to assess risk of bias in the included studies, including details of the tool(s) used, how many reviewers assessed each study and whether they worked independently, and if applicable, details of automation tools used in the process. | Methods |
| Effect measures | 12 | Specify for each outcome the effect measure(s) (e.g. risk ratio, mean difference) used in the synthesis or presentation of results. | Methods |
| Synthesis methods | 13a | Describe the processes used to decide which studies were eligible for each synthesis (e.g. tabulating the study intervention characteristics and comparing against the planned groups for each synthesis (item #5)). | Methods, |
| 13b | Describe any methods required to prepare the data for presentation or synthesis, such as handling of missing summary statistics, or data conversions. | Methods |
| 13c | Describe any methods used to tabulate or visually display results of individual studies and syntheses. | Methods |
| 13d | Describe any methods used to synthesize results and provide a rationale for the choice(s). If meta-analysis was performed, describe the model(s), method(s) to identify the presence and extent of statistical heterogeneity, and software package(s) used. | Methods |
| 13e | Describe any methods used to explore possible causes of heterogeneity among study results (e.g. subgroup analysis, meta-regression). | Methods |
| 13f | Describe any sensitivity analyses conducted to assess robustness of the synthesized results. | Methods |
| Reporting bias assessment | 14 | Describe any methods used to assess risk of bias due to missing results in a synthesis (arising from reporting biases). | Methods, Table 2, Table S6-13 |
| Certainty assessment | 15 | Describe any methods used to assess certainty (or confidence) in the body of evidence for an outcome. | Methods |
| **RESULTS** | | |  |
| Study selection | 16a | Describe the results of the search and selection process, from the number of records identified in the search to the number of studies included in the review, ideally using a flow diagram. | Results, Figure 1 |
| 16b | Cite studies that might appear to meet the inclusion criteria, but which were excluded, and explain why they were excluded. | Results, Table S5 |
| Study characteristics | 17 | Cite each included study and present its characteristics. | Results, Table 1 |
| Risk of bias in studies | 18 | Present assessments of risk of bias for each included study. | Table 2, Table S6-13 |
| Results of individual studies | 19 | For all outcomes, present, for each study: (a) summary statistics for each group (where appropriate) and (b) an effect estimate and its precision (e.g. confidence/credible interval), ideally using structured tables or plots. | Figure 2(a)-5 |
| Results of syntheses | 20a | For each synthesis, briefly summarise the characteristics and risk of bias among contributing studies. | Results, Table 2 |
| 20b | Present results of all statistical syntheses conducted. If meta-analysis was done, present for each the summary estimate and its precision (e.g. confidence/credible interval) and measures of statistical heterogeneity. If comparing groups, describe the direction of the effect. | Results, Figure 2(a)-5 |
| 20c | Present results of all investigations of possible causes of heterogeneity among study results. | Figure S7-S19 |
| 20d | Present results of all sensitivity analyses conducted to assess the robustness of the synthesized results. | Figure S1-S6 |
| Reporting biases | 21 | Present assessments of risk of bias due to missing results (arising from reporting biases) for each synthesis assessed. | Table 2, Figure S20 and S21 |
| Certainty of evidence | 22 | Present assessments of certainty (or confidence) in the body of evidence for each outcome assessed. | Figure 2(a)-5. Figure S1-S19 |
| **DISCUSSION** | | |  |
| Discussion | 23a | Provide a general interpretation of the results in the context of other evidence. | Discussion |
| 23b | Discuss any limitations of the evidence included in the review. | Discussion |
| 23c | Discuss any limitations of the review processes used. | Discussion |
| 23d | Discuss implications of the results for practice, policy, and future research. | Discussion |
| **OTHER INFORMATION** | | |  |
| Registration and protocol | 24a | Provide registration information for the review, including register name and registration number, or state that the review was not registered. | Methods |
| 24b | Indicate where the review protocol can be accessed, or state that a protocol was not prepared. | Methods |
| 24c | Describe and explain any amendments to information provided at registration or in the protocol. | Methods |
| Support | 25 | Describe sources of financial or non-financial support for the review, and the role of the funders or sponsors in the review. | Funding |
| Competing interests | 26 | Declare any competing interests of review authors. | Conflicts of Interest |
| Availability of data, code and other materials | 27 | Report which of the following are publicly available and where they can be found: template data collection forms; data extracted from included studies; data used for all analyses; analytic code; any other materials used in the review. | Results |

*From:*  Page MJ, McKenzie JE, Bossuyt PM, Boutron I, Hoffmann TC, Mulrow CD, et al. The PRISMA 2020 statement: an updated guideline for reporting systematic reviews. BMJ 2021;372:n71. doi: 10.1136/bmj.n71

## Table S2. Keywords and search strategy in the PubMed

| 1 | allergic rhinitis |
| --- | --- |
| 2 | perennial allergic rhinitis |
| 3 | seasonal allergic rhinitis |
| 4 | pollen allergy |
| 5 | pollen allergies |
| 6 | pollinosis |
| 7 | pollinoses |
| 8 | fever, Hay |
| 9 | hayfever |
| 10 | allergic rhinopathy |
| 11 | eosinophilic rhinitis |
| 12 | rhinitis allergica |
| 13 | rhinitis eosinophila |
| 14 | allerg* |
| 15 | rhinitis* |
| 16 | Rhinitis, Allergic [MeSH Terms] |
| 17 | #1 OR #2 OR #3 OR #4 OR #5 OR #6 OR #7 OR #8 OR #9 OR #10 OR #11 OR #12 OR #13 OR #14 OR #15 OR #16 |
| 18 | air filter |
| 19 | air filtration |
| 20 | air purifier |
| 21 | air purifiers |
| 22 | air purification |
| 23 | air clean |
| 24 | air cleaner |
| 25 | High-Efficiency Particulate Air |
| 26 | HEPA |
| 27 | air purifi* |
| 28 | air filt* |
| 29 | air clean* |
| 30 | air filters[MeSH Terms] |
| 31 | #18 OR #19 OR #20 OR #21 OR #22 OR #23 OR #24 OR #25 OR #26 OR #27 OR #28 OR #29 OR #30 |
| 32 | #17 AND #31 |

## Table S3. Keywords and search strategy in the Embase

| 1 | 'allergic rhinitis'/exp OR 'allergic rhinitis' OR 'allergic rhinopathy' OR 'eosinophil rhinitis' OR 'eosinophile rhinitis' OR 'eosinophilic rhinitis' OR 'eosinophilous rhinitis' OR 'rhinitis allergica' OR 'rhinitis eosinophila' OR 'rhinitis, allergic' |
| --- | --- |
| 2 | 'perennial rhinitis'/exp OR 'perennial allergic rhinitis' OR 'perennial allergic rhinoconjunctivitis' OR 'perennial rhinitis' OR 'persistent allergic rhinitis' OR 'rhinitis, allergic, perennial' OR 'rhinitis, perennial' |
| 3 | 'pollen allergy'/exp OR 'allergy, pollen' OR 'bronchitis, summer' OR 'fever, hay' OR 'hay fever' OR 'hayfever' OR 'intermittent allergic rhinitis' OR 'pollen allergy' OR 'pollen hypersensitivity' OR 'pollen sensitivity' OR 'pollenosis' OR 'pollinose' OR 'pollinosis' OR 'rhinitis, allergic, seasonal' OR 'seasonal allergic rhinitis' OR 'seasonal allergic rhinoconjunctivitis' OR 'seasonal pollinosis' OR 'seasonal rhinitis' OR 'summer bronchitis' |
| 4 | allerg* |
| 5 | rhinitis* |
| 6 | #1 OR #2 OR #3 OR #4 OR #5 |
| 7 | air filter'/exp OR 'dar (device)' OR 'air filter' OR 'air filters' OR 'air purifier' OR 'ambient air filter' OR 'inhaled-air filtering system' OR 'medical gas pipeline system air filter' OR 'non respiratory device air filter' OR 'non-respiratory device ambient air filter' OR 'patient breath collection filter' OR 'patient breath collection inhaled-air filtering system' OR 'air filtration' OR 'air purifiers' OR 'air purification' |
| 8 | 'air cleaning system'/exp OR 'air cleaner' OR 'air cleaners' OR 'air cleaning system' |
| 9 | 'hepa filter'/exp OR 'hepa filter' OR 'hepa-type filter' OR 'filter, hepa' OR 'high efficiency particle absorbing filter' OR 'high efficiency particle air filter' OR 'high efficiency particle arrestance filter' OR 'high efficiency particle arresting filter' OR 'high efficiency particle arrestor filter' OR 'high efficiency particular air filter' OR 'high efficiency particular arrestance filter' OR 'high efficiency particulate air filter' OR 'high efficiency particulate airtype filter' OR 'high efficiency particulate arrest filter' OR 'high efficiency particulate arrestance filter' OR 'high efficiency particulate arresting filter' OR 'high efficiency particulate arrestor filter' OR 'high efficiency particulates air filter' OR 'high efficient particulate air filter' |
| 10 | 'air purifi* |
| 11 | 'air filt*' |
| 12 | 'air clean*' |
| 13 | #7 OR #8 OR #9 OR #10 OR #11 OR #12 |
| 14 | #13 AND #14 |

## Table S4. Keywords and search strategy in the Cochrane Library

| 1 | MeSH descriptor: [Rhinitis, Allergic] explode all trees |
| --- | --- |
| 2 | (allergic rhinitis) |
| 3 | (perennial allergic rhinitis) |
| 4 | (seasonal allergic rhinitis) |
| 5 | (pollen allergy) |
| 6 | (pollen allergies) |
| 7 | (pollinosis) |
| 8 | (pollinoses) |
| 9 | (fever, hay) |
| 10 | (hayfever) |
| 11 | (allergic rhinopathy) |
| 12 | (eosinophilic rhinitis) |
| 13 | (rhinitis allergica) |
| 14 | (rhinitis eosinophila) |
| 15 | (allerg*) |
| 16 | (rhinitis*) |
| 17 | #1 OR #2 OR #3 OR #4 OR #5 OR #6 OR #7 OR #8 OR #9 OR #10 OR #11 OR #12 OR #13 OR #14 OR #15 OR #16 |
| 18 | MeSH descriptor: [Air Filters] explode all trees |
| 19 | (air filter) |
| 20 | (air filtration) |
| 21 | (air purifier) |
| 22 | (air purifiers) |
| 23 | (air purification) |
| 24 | (air clean) |
| 25 | (air cleaner) |
| 26 | (High-Efficiency Particulate Air) |
| 27 | (HEPA) |
| 28 | (air purifi*) |
| 29 | (air filt*) |
| 30 | (air clean*) |
| 31 | #18 OR #19 OR #20 OR #21 OR #22 OR #23 OR #24 OR #25 OR #26 OR #27 OR #28 OR #29 OR #30 |
| 32 | #17 AND #31 |

## Table S5. Excluded studies and reasons

| Authors, year | Study | Reasons |
| --- | --- | --- |
| Hauschildt et al. 1999. | Reactions of healthy persons and persons suffering from allergic rhinitis when exposed to office dust | The study did not meet the inclusion criteria for the population of allergic rhinitis. It included healthy subjects. The intervention was dust concentrations of 0 and 400 ug/m3, which is not compatible with our PICO. Besides, the study design was not randomized. |
| Muhamad et al. 2019. | Effectiveness of workplace interventions for treating work-related rhinitis and rhinosinusitis | The study did not meet the inclusion criteria for the population of allergic rhinitis. It included non-allergic rhinitis. The study was also a review which was withdrawn by Cochrane review due to a lack of progress. |
| Shusterman et al. 2003. | Chlorine inhalation produces nasal congestion in allergic rhinitis without mast cell degranulation | The study did not meet the inclusion criteria for the intervention of air filter device. They used Chlorine as an intervention compared with filter air. |
| Shusterman et al. 2004. | Chlorine inhalation produces nasal airflow limitation in allergic rhinitis subjects without evidence of neuropeptide release | The study did not meet the inclusion criteria for the intervention of air filter device. They used Chlorine as an intervention compared with filter air. |
| Shusterman et al. 2002. | Cholinergic blockade does not alter the nasal congestive response to irritant provocation | The study did not meet the inclusion criteria for the intervention of air filter device. They used Chlorine as an intervention compared with filter air. |
| Choe et al. 2018. | Efficacy of air purifier on allergic symptom and management of indoor particles in the adult with allergic rhinitis: A randomized controlled trial | This was a conference abstract from EAACI Congress 2018 |
| Gore et al. 2003. | Air filtration units in homes with cats: can they reduce personal exposure to cat allergen? | This study did not meet the inclusion criteria for the population of allergic rhinitis. It was not randomized control trial. It used 4 separate days examining four experimental conditions (cat absent or present, air filter device off or on) |
| Hauser et al. 2003. | The upper airway response to pollen is enhanced by exposure to combustion particulates: a pilot human experimental challenge study | This study did not meet the criteria for the intervention of air filters. The used particulate and pollen as interventions. |
| Jörres et al. 1996. | The effect of ozone exposure on allergen responsiveness in subjects with asthma or rhinitis | This study did not meet the criteria for the intervention of air filters. The used ozone as interventions. |
| Karlsson et al. 2004. | Allergen avoidance does not alter airborne cat allergen levels in classrooms | This study did not meet the criteria for the population of allergic rhinitis. It included normal class. The intervention was the measures recommended by the Swedish National Institute of Public Health. Curtains, upholstery and plants were removed, bookshelves were replaced with cupboards and regular cleaning was increased. |
| Bascom et al. 1990. | Effect of ozone inhalation on the response to nasal challenge with antigen of allergic subjects | This study did not meet the criteria for the intervention of air filters. They used ozone exposure as interventions. |
| Munir et al. 1994. | Indirect contact with pets can confound the effect of cleaning procedures for reduction of animal allergen levels in house dust | This study did not meet the criteria for the population of allergic rhinitis. It contained allergic children. The intervention was vacuum Tannic acid. In the outcome measurement, it measured Fel d I and Can f I allergens. |
| Munir et al. 1993. | Vacuum cleaning decreases the levels of mite allergens in house dust | This study did not meet the criteria for the intervention of air filters. They used vacuum as intervention. |
| Lueer et al. 2014. | Dose-range finding of natural birch pollen exposure in patients with seasonal allergic rhinitis in the Fraunhofer Environmental Challenge Chamber | This study did not meet the criteria for the intervention of air filters. They used the Fraunhofer Environmental Challenge Chamber as intervention. |
| Larsson et al. 2013. | Airway inflammatory responses to diesel exhaust in allergic rhinitis | This study did not meet the criteria for the intervention of air filters. They used diesel-exhaust exposure as intervention. |
| Dokic et al. 2013. | Ozone exaggerates nasal allergic inflammation | This study did not meet the criteria for the intervention of air filter. They used ozone exposure as interventions. |
| Kenney et al. 2015. | Preventive effect of nasal filters on allergic rhinitis: A randomized, double-blind, placebo-controlled crossover park study | This study did not meet the criteria for the intervention of air filters. They used nasal filter as intervention. |
| Kenney et al. 2014. | Nasal filters for the treatment of allergic rhinitis: a randomized, double-blind, placebo-controlled crossover clinical trial | This study did not meet the criteria for the intervention of air filter. They used nasal filter as intervention. |

## Table S6. Comprehensive information on the Risk of Bias in Park et al. Study

Outcomes: nasal symptom score

References:

Park KH, Sim DW, Lee SC, et al. Effects of Air Purifiers on Patients with Allergic Rhinitis: a Multicenter, Randomized, Double-Blind, and Placebo-Controlled Study. Yonsei Med J. Aug 2020;61(8):689-697.

| Domains | Low | Some concerns | High | Comment | Quote (indicate reference) |
| --- | --- | --- | --- | --- | --- |
| Domain 1: Randomization process | X |  |  | The allocation sequence was random.  The allocation sequence was concealed until participants were enrolled and assigned to interventions.  There were no baseline differences between intervention groups, suggesting a problem with the randomization process. | ‘A total of 44 patients were randomly assigned to either active purifier (AP, n=22) or mockup (placebo) purifier (MP, n=22) groups.’ (Inclusion and exclusion criteria for enrollment, 4th paragraph, 1st sentence)  ‘Randomization was 1:1 via computer-generated schedule (in the order registered) and was carried out by a non-participating third party.’ (Inclusion and exclusion criteria for enrollment, 4th paragraph, 3rd sentence) |
| Domain 2:  Deviations from the intended interventions | X |  |  | Participants were not aware of their assigned intervention during the trial.  Carers and people delivering the interventions were unaware of the participants' assigned intervention during the trial.  There was an appropriate analysis used to estimate the effect of assignment to intervention. | ‘By design, this was a 6-week multicenter, double-blind, and placebo-controlled study conducted at two centers in South Korea.’ (Study design and ethical statement, 1st paragraph, 1st sentence)  The study used ITT to estimate the effect of assignment on intervention. |
| Domain 3:  Missing outcome data | X |  |  | Data for this outcome were available for all, or nearly all, participants randomized. | The missing outcome was 2.2%. |
| Domain 4: Measurement of the outcomes | X |  |  | The method of measuring the outcome was appropriate.  Measurement or ascertainment of the outcome showed no difference between intervention groups.  Outcome assessors were not aware of the intervention received by study participants. | ‘The study used AR symptoms score to measure the outcome. (Primary and secondary endpoints, 2nd paragraph, 1st sentence)’  ‘Clinical manifestations of AR were monitored at 0, 3, and 6 weeks using questionnaires based on the averages of the prior week. Each patient received a diary outlining questions pertinent to their symptoms, medication use, etc., and was asked to record daily, starting from 1 week before the beginning of the purifier operation. All subjects were required to bring diaries to each of their three hospital visits.’ (Primary and secondary endpoints, 1st paragraph)  The outcome assessor was the study participant who was blinded to the study. |
| Domain 5:  Selective reporting | X |  |  | There was information about the data that produced this result analyzed in accordance with a pre-specified analysis plan that was finalized before unblinded outcome data were available for analysis.  There were no multiple eligible outcome measurements (e.g. scales, definitions, time points) within the outcome domain.  There were no multiple eligible analyses of the data. | The result was analyzed according to a pre-specified analysis plan. |

## Table S7. Comprehensive information on the Risk of Bias in Li et al. Study

Outcomes: allergy symptom scores

References:

Li L, Zhang L, Mo JH, et al. Efficacy of indoor air purification in the treatment of Artemisia pollen-allergic rhinitis: A randomised, double-blind, clinical controlled trial. Clin Otolaryngol. May 2020;45(3):394-401.

| Domains | Low | Some concerns | High | Comment | Quote (indicate reference) |
| --- | --- | --- | --- | --- | --- |
| Domain 1: Randomization process |  | X |  | The allocation sequence was random.  No information about the allocation sequence was concealed until participants were enrolled and assigned to interventions.  There were no baseline differences between intervention groups, suggesting a problem with the randomization process. | ‘Enrolled patients were randomly assigned to one of two groups in equal numbers.’ (2.2 | Study design and participants, 1st paragraph, 12th sentence)  ‘There were no significant differences between the active and inactive air purifier groups for any medical or demographic variables’ (Table 4). |
| Domain 2:  Deviations from the intended interventions | X |  |  | Participants were not aware of their assigned intervention during the trial.  Carers and people delivering the interventions were unaware of the participants' assigned intervention during the trial.  There was an appropriate analysis used to estimate the effect of assignment to intervention. | ‘In this randomized, double-blind, placebo-controlled clinical trial, we tested active and placebo versions of an air purifier.’ (2.2 | Study design and participants, 1st paragraph, 8th sentence)  This study used intention-to-treat (ITT) analyses. |
| Domain 3:  Missing outcome data | X |  |  | Data for this outcome were available for all, or nearly all, participants randomized. | ‘Three participants dropped out of the study because of an inability to comply with the study protocol. The missing outcomes were less than 5 %.’ (Results, 1st paragraph, 3rd sentence) |
| Domain 4: Measurement of the outcomes | X |  |  | The method of measuring the outcome was appropriate.  Measurement or ascertainment of the outcome showed no difference between intervention groups.  Outcome assessors were probably not aware of the intervention received by study participants. | ‘Allergy symptom scores ranged from 0 to 3, with symptoms graded as 0 (no symptoms), 1 (slight symptoms), 2 (moderate symptoms) and 3 (severe symptoms). Symptoms to be graded included congestion, sneezing, nasal itchiness, rhinorrhea, eye itchiness, ear/ palate itchiness, eye redness and tearing.’ (2.3 | Variables, 1st paragraph, 10th sentence)  There was no difference between the two groups.  ‘It was a double-blind study. The research staff were not aware of the intervention received by study participants.’ (2.4 | Data collection and management). |
| Domain 5:  Selective reporting | X |  |  | There was information about the data that produced this result analyzed in accordance with a pre-specified analysis plan that was finalized before unblinded outcome data were available for analysis.  There were no multiple eligible outcome measurements (e.g. scales, definitions, time points) within the outcome domain.  There were no multiple eligible analyses of the data. | The results were analyzed according to a pre-specified analysis plan. |

## Table S8. Comprehensive information on the Risk of Bias in Wood et al. Study

Outcomes: nasal symptom scores

References:

Wood RA, Johnson EF, Van Natta ML, Chen PH, Eggleston PA. A placebo-controlled trial of a HEPA air cleaner in the treatment of cat allergy. Clinical Trial; Controlled Clinical Trial; Journal Article; Research Support, Non‐U.S. Gov't. American journal of respiratory and critical care medicine. 1998;158(1):115‐120.

| Domains | Low | Some concerns | High | Comment | Quote (indicate reference) |
| --- | --- | --- | --- | --- | --- |
| Domain 1: Randomization process |  | X |  | The allocation sequence was random.  No information about the allocation sequence was concealed until participants were enrolled and assigned to interventions.  There were no baseline differences between intervention groups, suggesting a problem with the randomization process. | ‘Thirty-five subjects completed the study protocol. Eighteen subjects were randomized to the active HEPA filter group and 17 to the placebo filter group.’ (Results, 1st paragraph, 1st sentence)  ‘There were no significant differences between the active and placebo groups for any medical or demographic variable’ (Results, 1st paragraph, last sentence) |
| Domain 2:  Deviations from the intended interventions | X |  |  | Participants were unaware of their assigned intervention during the trial.  Carers and people delivering the interventions were unaware of the participants' assigned intervention during the trial.  There was an appropriate analysis used to estimate the effect of assignment to intervention. | ‘The study was a double-blind, placebo-controlled trial.’ (Study designs, 1st paragraph, first sentence)  ‘Three subjects dropped out of the study because of an inability to comply with the study protocol. The study was analyzed by modified intention-to-treat (mITT) analyses, excluding participants with missing outcome data.’ (Results, 1st paragraph, 2nd sentence) |
| Domain 3:  Missing outcome data | X |  |  | Data for this outcome were not available for all, or nearly all, participants randomized.  There was no evidence that the result was not biased by missing outcome data.  Missingness in the outcome probably could not depend on its true value. | ‘Available data was 35/38, which was less than 95%.’ (Results, 1st paragraph, 1st sentence).  No analysis or sensitivity analysis methods were noted in the article.  ‘All missing outcome data occurred for documented reasons because of an inability to comply with the study protocol.’ (Results, 1st paragraph, 1st sentence). |
| Domain 4: Measurement of the outcomes | X |  |  | The method of measuring the outcome was appropriate.  Measurement or ascertainment of the outcome showed no difference between intervention groups.  Outcome assessors were not aware of the intervention received by study participants. | ‘The study used daily diaries to record symptom scores and measure the outcomes.’ (Study designs, 2nd paragraph, 4th sentence).  ‘There was no difference between the experimental and comparator groups.’ (Study designs, 5th paragraph, 4th sentence).  For participant-reported outcomes, the outcome assessor was the study participant. The study participants used daily diaries to record their symptoms, and they were blinded to the study. |
| Domain 5:  Selective reporting |  | X |  | There was no information about the data that produced this result analyzed in accordance with a pre-specified analysis plan that was finalized before unblinded outcome data were available for analysis.  There were no multiple eligible outcome measurements (e.g. scales, definitions, time points) within the outcome domain.  There were no multiple eligible analyses of the data. | There was no pre-specified analysis plan information for this article that could be obtained. |

## Table S9. Comprehensive information on the Risk of Bias in Brehler et al. Study

Outcomes: nose symptom score

References:

Brehler R, Kütting B, Biel K, Luger T. Positive effects of a fresh air filtration system on hay fever symptoms. Clinical Trial; Controlled Clinical Trial; Journal Article. International archives of allergy and immunology. 2003;130(1):60‐65.

| Domains | Low | Some concerns | High | Comment | Quote (indicate reference) |
| --- | --- | --- | --- | --- | --- |
| Domain 1: Randomization process | X |  |  | The allocation sequence was random.  The allocation sequence was concealed until participants were enrolled and assigned to interventions.  There was no baseline information for the two groups after randomization. | ‘The sequence of the two periods (active filter – placebo filter) was set up by the external statistician, by a randomized block design.’ (Study design, 1st paragraph, 1st to 4th sentences) |
| Domain S:  Carryover effects |  | X |  | The number of participants allocated to the two sequences was equal or nearly equal.  There was no information on sufficient time for any carryover effects to disappear before the outcome assessment in the second period. | ‘According to the random plan, active filters were used during the first 2-week period in the homes of 20 volunteers (45.5%) and the second period for 24 volunteers (54.5%). (Results, 1st paragraph, 1st to 4th sentences) |
| Domain 2:  Deviations from the intended interventions | X |  |  | Participants were unaware of their assigned intervention during each trial period.  Carers and people delivering the interventions were not aware of the participants' assigned intervention during each period of the trial.  There was an appropriate analysis used to estimate the effect of assignment to intervention. | ‘Neither the volunteers nor the clinical investigators were aware of the type of filter used during either of the two study periods.’ (Study design, 1st paragraph, 14th sentence)  The study used ITT to estimate the effect of assignment on intervention. |
| Domain 3:  Missing outcome data | X |  |  | Data for this outcome was available for all, or nearly all, participants randomized. | ‘In the final questionnaire, we asked the volunteers if symptoms had decreased during the two study periods. Overall, 33 of the 44 (75%) volunteers reported a decrease in their allergy symptoms,’ (Results, 1st paragraph, 4th to 7th sentence) |
| Domain 4: Measurement of the outcomes | X |  |  | The method of measuring the outcome was appropriate.  There was no difference in measurement or ascertainment of the outcome between interventions within each sequence.  Outcome assessors were not aware of the intervention received by study participants. | ‘The study used symptom score to measure the outcome’ (Study design, 1st paragraph, 18th to 19th sentence)  ‘Patients recorded their symptoms during 12-hour periods (in the mornings and the evenings) on a daily log.’ (Study design, 1st paragraph, 16th to 17th sentence)  ‘Neither the volunteers nor the clinical investigators were aware of the type of filter used during either of the two study periods.’ (Study design, 1st paragraph, 14th to 16th sentence) |
| Domain 5:  Selective reporting |  | X |  | There was no pre-specified analysis plan available.  One measurement method was used for this outcome. There were no multiple eligible outcome measurements (e.g. scales, definitions, time points) within the outcome domain.  There were no multiple eligible analyses of the data.  Data from both periods contribute to the result. | ‘Subjective symptoms concerning eyes, nose, and lung were scored on an analog scale of 0–3’ (Table 2).  ‘Data of patients who suffered only from hay fever and those of volunteers with additional perennial allergy symptoms were analyzed separately. A conservative binominal test was used to test the significance of the main outcome parameter.’ (Statistical Analysis) |

## Table S10. Comprehensive information on the Risk of Bias in Stillerman et al. Study

Outcomes: total symptom scores

References:

Stillerman A, Nachtsheim C, Li W, Albrecht M, Waldman J. Efficacy of a novel air filtration pillow for avoidance of perennial allergens in symptomatic adults. Ann Allergy Asthma Immunol. May 2010;104(5):440-9.

| Domains | Low | Some concerns | High | Comment | Quote (indicate reference) |
| --- | --- | --- | --- | --- | --- |
| Domain 1: Randomization process | X |  |  | The allocation sequence was random.  The allocation sequence was concealed until participants were enrolled and assigned to interventions.  There was no baseline information between intervention groups at the start of the first period, suggesting a problem with the randomization process. | ‘This study was a randomized, double-blind, placebo-controlled, crossover trial. Patients were assigned to placebo-then-active or active-then-placebo treatments. An indexed list of enrollment numbers and matching PAF devices in sealed envelopes was used to blind the researchers.’ (Study design, 1st paragraph,1st to 4th sentence) |
| Domain S:  Carryover effects | X |  |  | There was no information on participants allocated to each of the two sequences equal or nearly equal.  The period effects are accounted for in the analysis.  There was sufficient time for any carryover effects to have disappeared before outcome assessment in the second period. | ‘Patients were assigned on a rolling basis to the following periods: 1-week run-in, 2-week treatment, 1-week washout, 2-week treatment, and 1-week washout. During treatment periods, patients slept on the assigned PAF device. During washout and run-in periods, patients slept in their bedrooms without a PAF treatment device and using their pillows. Allergy medications and ocular preparations were prohibited, along with contact lens use overnight.’ (Study design, 2nd paragraph) |
| Domain 2:  Deviations from the intended interventions | X |  |  | Participants were unaware of their assigned intervention during each period of the trial.  Carers and people delivering the interventions were not aware of the participants' assigned intervention during each period of the trial.  There was an appropriate analysis used to estimate the effect of assignment to intervention. | ‘This study was a randomized, double-blind, placebo-controlled, crossover trial.’ (Study design, 1st paragraph, 1st sentence)  ‘Of 48 patients screened, 38 were randomized; 3 patients were dropped from the study because of noncompliance, resulting in an entire study population of 35 individuals. The study used modified ITT analysis.’ (Results, study population, 1st paragraph, 1st sentence) |
| Domain 3:  Missing outcome data | X |  |  | Data for this outcome were not available for all, or nearly all, participants randomized.  There was no evidence that the result was not biased by missing outcome data.  Missingness in the outcome could not depend on its true value. | The missing outcomes were about 7.9%, more than 5 %.  There were no analysis methods that correct for bias or sensitivity analyses.  3 patients were dropped from the study because of noncompliance (Results, study population, 1st paragraph, 1st to 2nd sentence) |
| Domain 4: Measurement of the outcomes | X |  |  | The method of measuring the outcome was appropriate.  Measurement or ascertainment of the outcome showed no difference between interventions within each sequence.  Outcome assessors were not aware of the intervention received by study participants. | The study used symptom scores to measure outcomes.  ‘Patients recorded their symptom severity in their diary on waking and before going to bed.’  ‘These were participant-reported outcomes, and the outcome assessor is the study participant.’ (Assessments, 2nd paragraph)’ |
| Domain 5:  Selective reporting | X |  |  | A pre-specified analysis plan was finalized before unblinded outcome data were available for analysis.  There were no multiple eligible outcome measurements (e.g. scales, definitions, time points) within the outcome domain.  There were no multiple eligible analyses of the data.  Both periods contribute to the result being assessed for risk of bias. | The study protocol was approved by the Western Institutional Review Board (Olympia, Washington), and participants provided written informed consent. The Clinical Research Institute Inc. of Minneapolis performed the study during the spring and summer of 2008. (Study population, 2nd paragraph) |

## Table S11. Comprehensive information on the Risk of Bias in Antonicelli et al. Study

Outcomes: total symptom score

References:

Antonicelli L, Bilò MB, Pucci S, Schou C, Bonifazi F. Efficacy of an air-cleaning device equipped with a high efficiency particulate air filter in house dust mite respiratory allergy. Allergy. Nov 1991;46(8):594-600.

| Domains | Low | Some concerns | High | Comment | Quote (indicate reference) |
| --- | --- | --- | --- | --- | --- |
| Domain 1: Randomization process |  | X |  | The allocation sequence was random.  There was no information on whether the allocation sequence was concealed until participants were enrolled and assigned to interventions.  There were no baseline differences between intervention groups at the start of the first period, suggesting a problem with the randomization process. | ‘Patients were randomly divided into two groups of five and four subjects in each.’ (Study design, 1st paragraph, 1st sentence).  There were no significant differences between the groups concerning the mean baseline FEV1, area of cutaneous wheal and PD20 FEV1 methacholine. |
| Domain S:  Carryover effects |  | X |  | The number of participants allocated to the two sequences was equal or nearly equal.  There was no information on sufficient time for any carryover effects to disappear before the outcome assessment in the second period. | ‘Patients were randomly divided into groups of five and four subjects in each.’ (Study design, 1st paragraph, 2nd – 3rd sentence) |
| Domain 2:  Deviations from the intended interventions |  | X |  | Participants were aware of their assigned intervention during each period of the trial.  There was no information about whether carers and people delivering the interventions were aware of participants' assigned intervention during each period of the trial or not.  There was no information about whether the deviations from the intended intervention arose because of the trial context.  There was an appropriate analysis used to estimate the effect of assignment to intervention. | Participants may understand which group they were allocated. ‘One group used Enviraeaire (in the bedroom) 24 h/day for at least 8 weeks, as well as the routine house cleaning. The other group in the same test period carried out only routine house cleaning…’ (Study design, 1st paragraph, 6th sentence).  This study used ITT analysis. |
| Domain 3:  Missing outcome data | X |  |  | No missing data. All participants completed the study. | ‘All patients completed the study’ (Results, 1st sentence) 2nd – 3rd |
| Domain 4: Measurement of the outcomes |  |  | X | The method of measuring the outcome was appropriate.  Measurement or ascertainment of the outcome showed no difference between interventions within each sequence.  Outcome assessors probably aware of the intervention received by study participants.  The assessment of the outcome could probably be influenced by knowledge of the intervention received. | ‘…they made daily recordings of their symptom score....’ (Study design, 3rd paragraph, 5th sentence)  Participants may understand which group they were allocated, and they used daily records to record their symptoms. (Study design, 1st paragraph, 6th sentence). |
| Domain 5:  Selective reporting |  | X |  | There was no pre-specified analysis plan available.  There were no multiple eligible outcome measurements (e.g. scales, definitions, time points) within the outcome domain.  There were no multiple eligible analyses of the data. | The subjective severity of their symptoms was scored on an analog scale from  0 (asymptomatic) to 3 (maximum symptoms). These symptoms included rhinitis, cough, dyspnea…’ (Study design, 3rd paragraph, 9th sentence). |

## Table S12. Comprehensive information on the Risk of Bias in Reisman et al. Study

Outcomes: daily symptom/medication score

References:

Reisman RE, Mauriello PM, Davis GB, Georgitis JW, DeMasi JM. A double-blind study of the effectiveness of a high-efficiency particulate air (HEPA) filter in the treatment of patients with perennial allergic rhinitis and asthma. J Allergy Clin Immunol. Jun 1990;85(6):1050-7.

| Domains | Low | Some concerns | High | Comment | Quote (indicate reference) |
| --- | --- | --- | --- | --- | --- |
| Domain 1: Randomization process |  | X |  | The allocation sequence was random.  There was no information on whether the allocation sequence was concealed until participants were enrolled and assigned to interventions.  There was no baseline information between intervention groups at the start of the first period, suggesting a problem with the randomization process. | ‘The patients were randomly assigned to this schedule.’ (Conduct of study, 4th paragraph, 6th sentence) |
| Domain S:  Carryover effects | X |  |  | The number of participants allocated to each of the two sequences was equal or nearly equal.  There was sufficient time for any carryover effects to have disappeared before outcome assessment in the second period. | During the 8-week period of the study, one-half of the patients used the ENVIRACAIRE unit with the HEPA filter for the first 4 weeks, followed by the placebo filter for the second 4 weeks. The other half of the patients used the placebo filter for the first 4 weeks, followed by the HEPA filter for the second 4 weeks. (Conduct the study, 4th paragraph, 1st sentence)  To eliminate (1) any carryover from the previous time period and (2) the influence of respiratory infection, the results of the last 14 days of each treatment period in which respiratory infections were not present were also evaluated. (Analysis, 3rd paragraph, 1st sentence) |
| Domain 2:  Deviations from the intended interventions | X |  |  | Participants were not aware of their assigned intervention during each period of the trial.  Carers and people delivering the interventions were not aware of the participants' assigned intervention during each period of the trial.  An appropriate analysis is used to estimate the effect of assignment to intervention. | ‘The study was conducted in a double-blind fashion….’ (Conduct of study, 1st paragraph, last sentence)  This study analyzed outcomes by excluding missing outcomes, which was considered a modified ITT analysis. (Results, 1st paragraph, 1st sentence) |
| Domain 3:  Missing outcome data | X |  |  | Data for this outcome were not available for all, or nearly all, participants randomized.  There was no evidence that the result was not biased by missing outcome data.  Missingness in the outcome could not depend on its true value. | ‘Forty patients were initially enrolled in the study, 20 at each site; there were eight dropouts.’ (Results, 1st paragraph, first sentence)  The reasons of missing outcomes were unrelated to the outcome. (Results, 1st paragraph) |
| Domain 4: Measurement of the outcomes | X |  |  | The method of measuring the outcome was appropriate.  Measurement or ascertainment of the outcome has no difference between interventions within each sequence.  Outcome assessors were not aware of the intervention received by study participants. | ‘This study used daily symptoms scores to measure outcomes.’ (Analysis, 1st paragraph)  ‘Daily symptom medication scores were recorded by each patient.’ (Analysis, 1st paragraph)  The assessment of the objective scoring and the patient’s subjective responses, described below, was done by the investigators, who were also unaware of the type of filter used during each of the 4-week periods. (Conduct of study, 6th paragraph) |
| Domain 5:  Selective reporting |  | X |  | There was no pre-specified analysis plan available.  There were no multiple eligible outcome measurements (e.g. scales, definitions, time points) within the outcome domain.  There were no multiple eligible analyses of the data  Data from both periods contribute to the result | ‘Symptom score data and medication use were analyzed with two nonparametric statistical methods, the sign test and the Wilcoxon matched-pairs rank-sum test…’ (Analysis, 1st paragraph, 5th sentence) |

## Table S13. Comprehensive information on the Risk of Bias in Kooistra et al. Study

Outcomes: symptom scores

References:

Kooistra JB, Pasch R, Reed CE. The effects of air cleaners on hay fever symptoms in air-conditioned homes. J Allergy Clin Immunol. May 1978;61(5):315-9.

| Domains | Low | Some concerns | High | Comment | Quote (indicate reference) |
| --- | --- | --- | --- | --- | --- |
| Domain 1: Randomization process |  | X |  | The allocation sequence was random.  There was no information about the concealed allocation sequence.  There was no baseline information for the two groups after randomization. | ‘A crossover design with covariates was chosen, with each subject randomly assigned to one of two groups (group I and II) matched for skin test sensitivity to ragweed and Alternaria.’ (Method of study, 2nd paragraph, 1st–2nd sentence). |
| Domain S:  Carryover effects |  | X |  | The number of participants allocated to each of the two sequences was equal. There was no information on sufficient time for any carryover effects to disappear before the outcome assessment in the second period. | ‘Each group consisted of 10 subjects. (Method of study, 2nd paragraph, 4th sentences) |
| Domain 2:  Deviations from the intended interventions | X |  |  | Participants were not aware of their assigned intervention during each period of the trial.  Carers and people delivering the interventions were unaware of the participants' assigned intervention during each trial period.  There was an appropriate analysis used to estimate the effect of assignment to intervention. | ‘A prospective, double-blind crossover study of the efficacy of a mechanical home air cleaner in centrally air-conditioned homes and its effect on hay fever symptoms.’ (Abstract)  This study used ITT analysis. All 20 patients satisfactorily completed the 8-wk study after randomization. |
| Domain 3:  Missing outcome data | X |  |  | Data for this outcome was available for all, or nearly all, participants randomized. | ‘All 20 patients satisfactorily completed the 8-week study.’ (Results section, 1st paragraph, 1st sentence)’ |
| Domain 4: Measurement of the outcomes | X |  |  | The method of measuring the outcome was appropriate.  There was no difference in measurement or ascertainment of the outcome between interventions within each sequence.  Outcome assessors were not aware of the intervention received by study participants. | ‘Patients were asked to fill out a daily symptom scorecard similar to previously described to assess hay fever symptoms.’ (Symptom evaluation section, 1st paragraph, 1st sentence)  Because the patients recorded the symptom scores by themselves and they were blinded, so the outcome assessors were not aware of the intervention they received. |
| Domain 5:  Selective reporting |  | X |  | There was no pre-specified analysis plan available.  One measurement method was used for this outcome. There were no multiple eligible outcome measurements (e.g. scales, definitions, time points) within the outcome domain.  There were no multiple eligible analyses of the data  Data from both periods contribute to the result | ‘The study used the symptom score, which was appropriate to measure the outcome. To ensure as prompt and accurate symptom scoring as possible, patients made daily recordings and their symptom score sheets were collected weekly'.’ (Symptom evaluation section, 1st paragraph, last three sentences)  Four symptom scores were computed for each of the 56 days of the study. (Symptom evaluation section, 2nd paragraph, 1st sentence) |

# Part 2: Supplementary Figures

## Sensitivity analysis

**
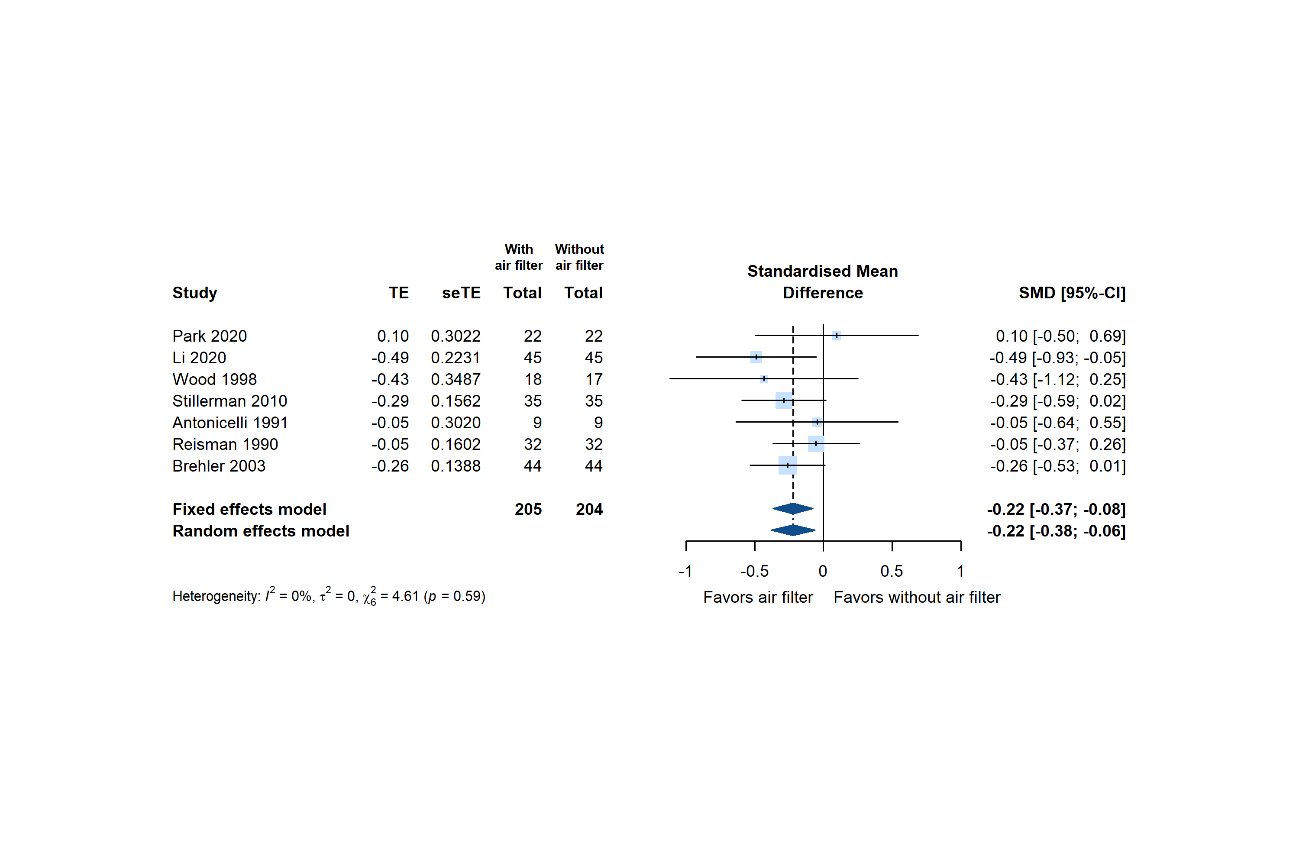
**

**Figure S1.** Forest plot of symptom score pooled with nighttime symptoms after removing the study by Kooistra et al.


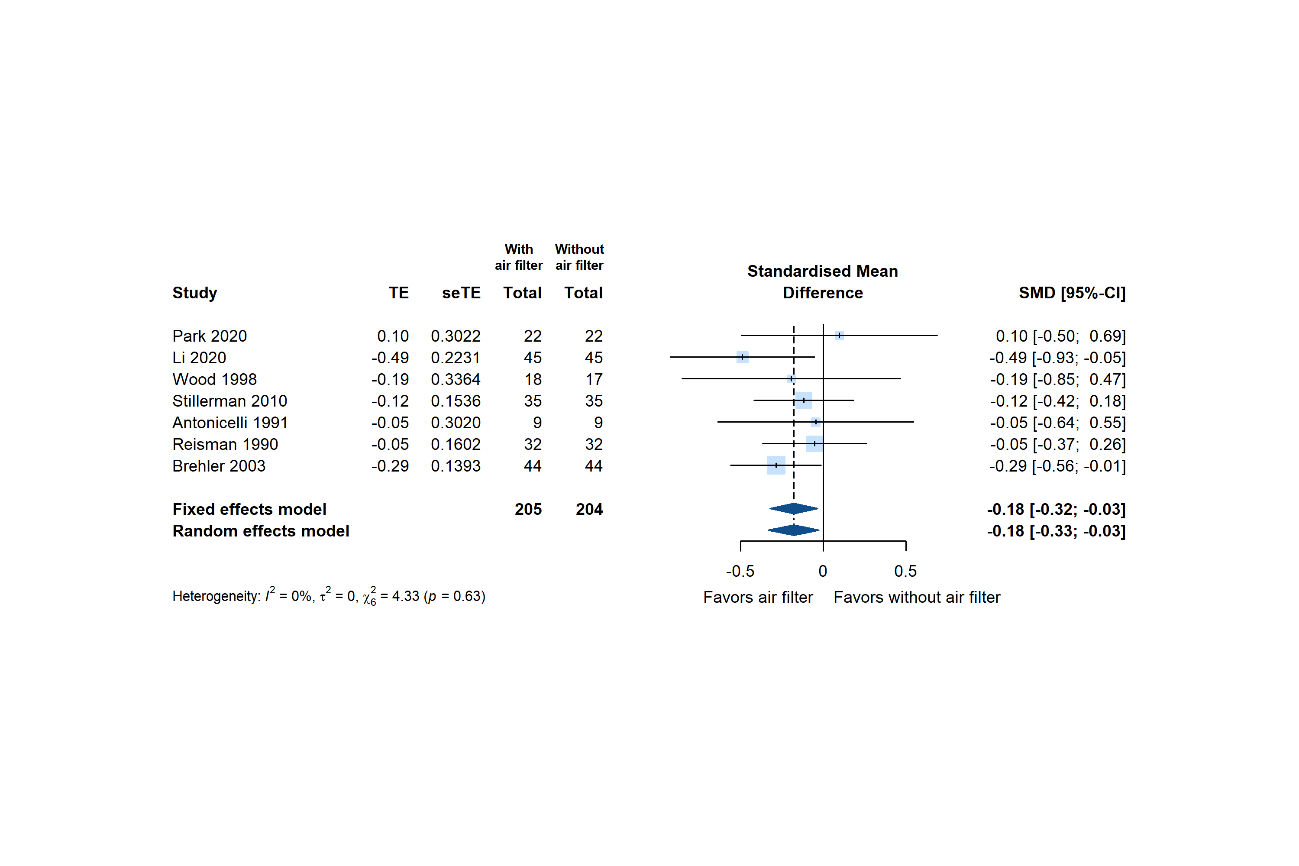


**Figure S2.** Forest plot of symptom score pooled with daytime symptoms after removing the study by Kooistra et al.


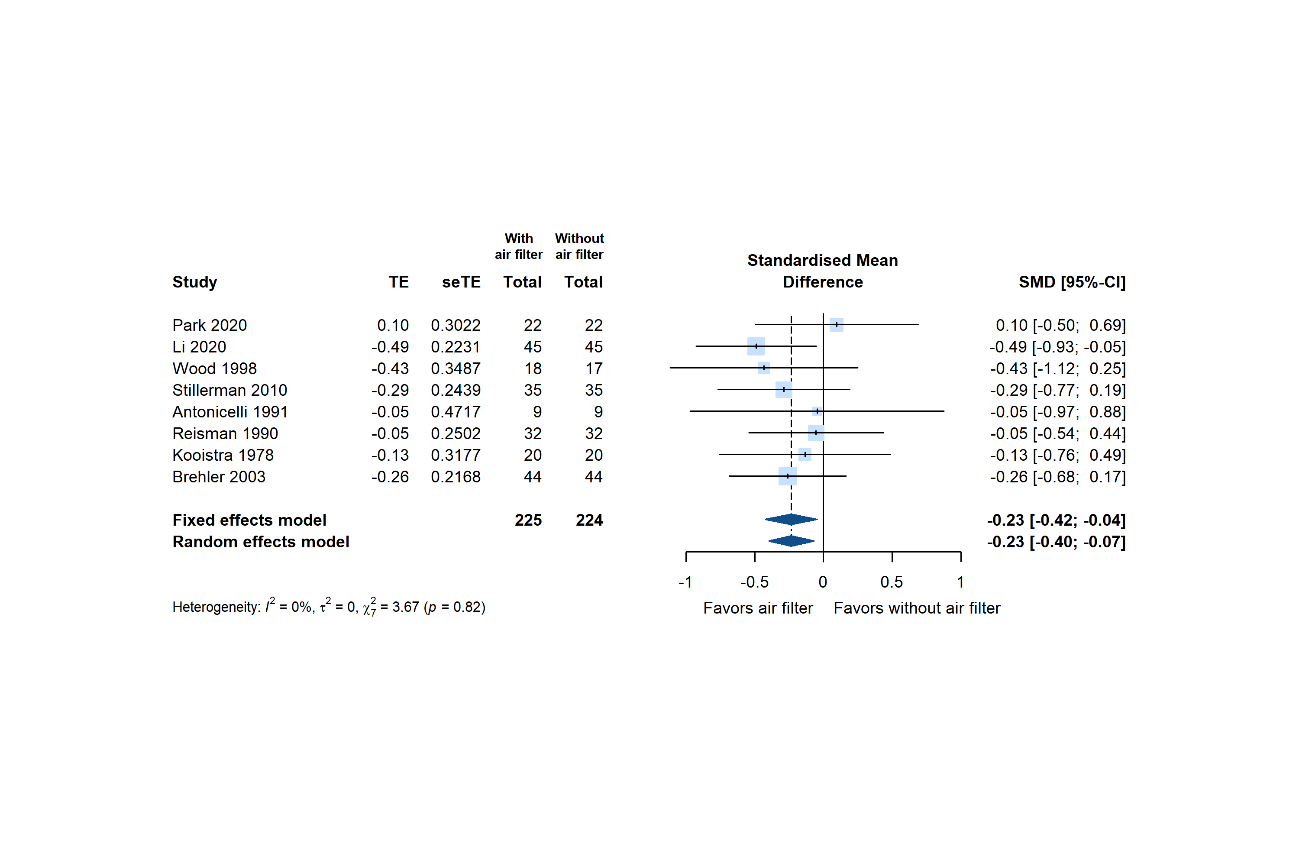


**Figure S3.** Forest plot of symptom score pooled with nighttime symptoms by assuming the correlation coefficient between the experimental and control periods in crossover studies was 0.


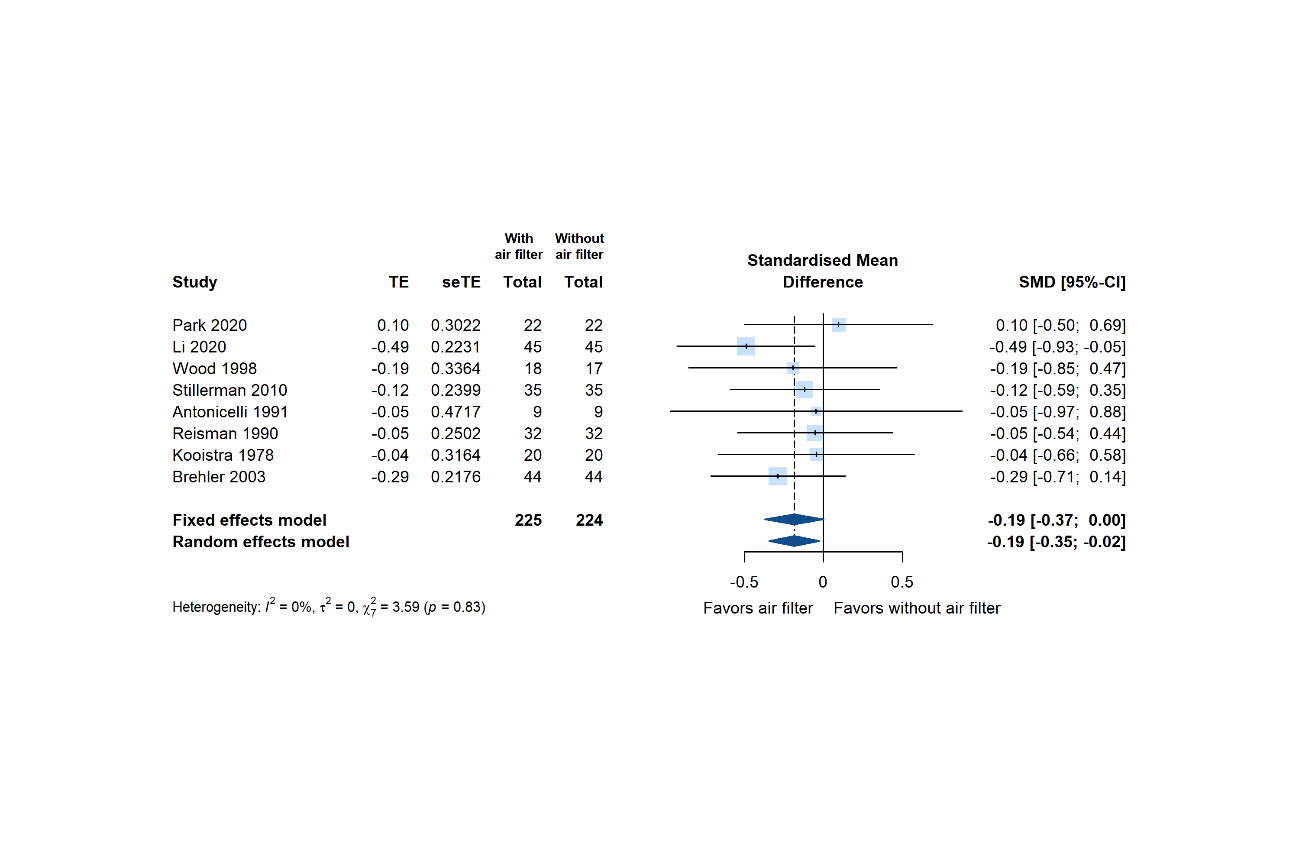


**Figure S4.** Forest plot of symptom score pooled with daytime symptoms by assuming the correlation coefficient between the experimental and control periods in crossover studies was 0.


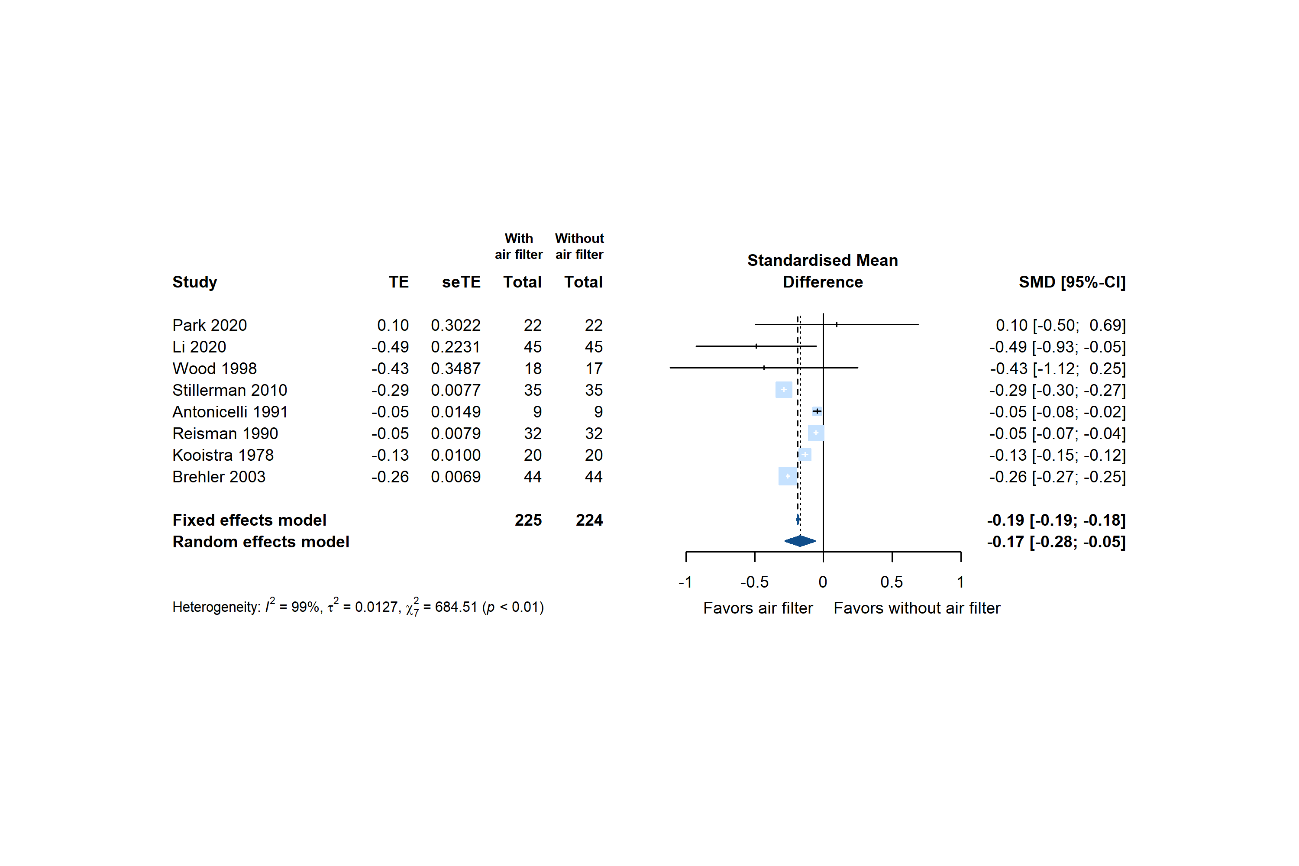


**Figure S5.** Forest plot of symptom score pooled with nighttime symptoms by assuming the correlation coefficient between the experimental and control periods in crossover studies was 0.99.


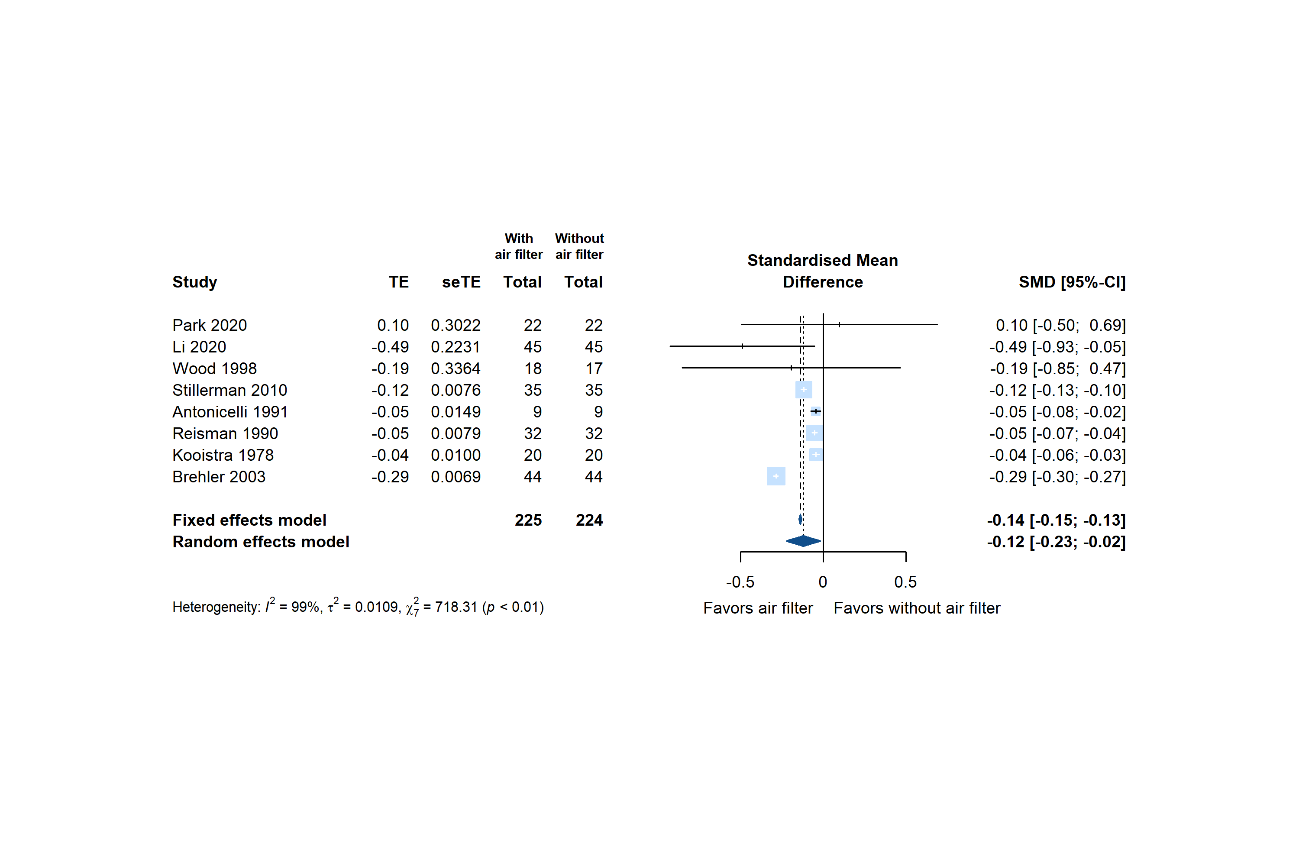


**Figure S6.** Forest plot of symptom score pooled with daytime symptoms by assuming the correlation coefficient between the experimental and control periods in crossover studies was 0.99.

## Subgroup analysis


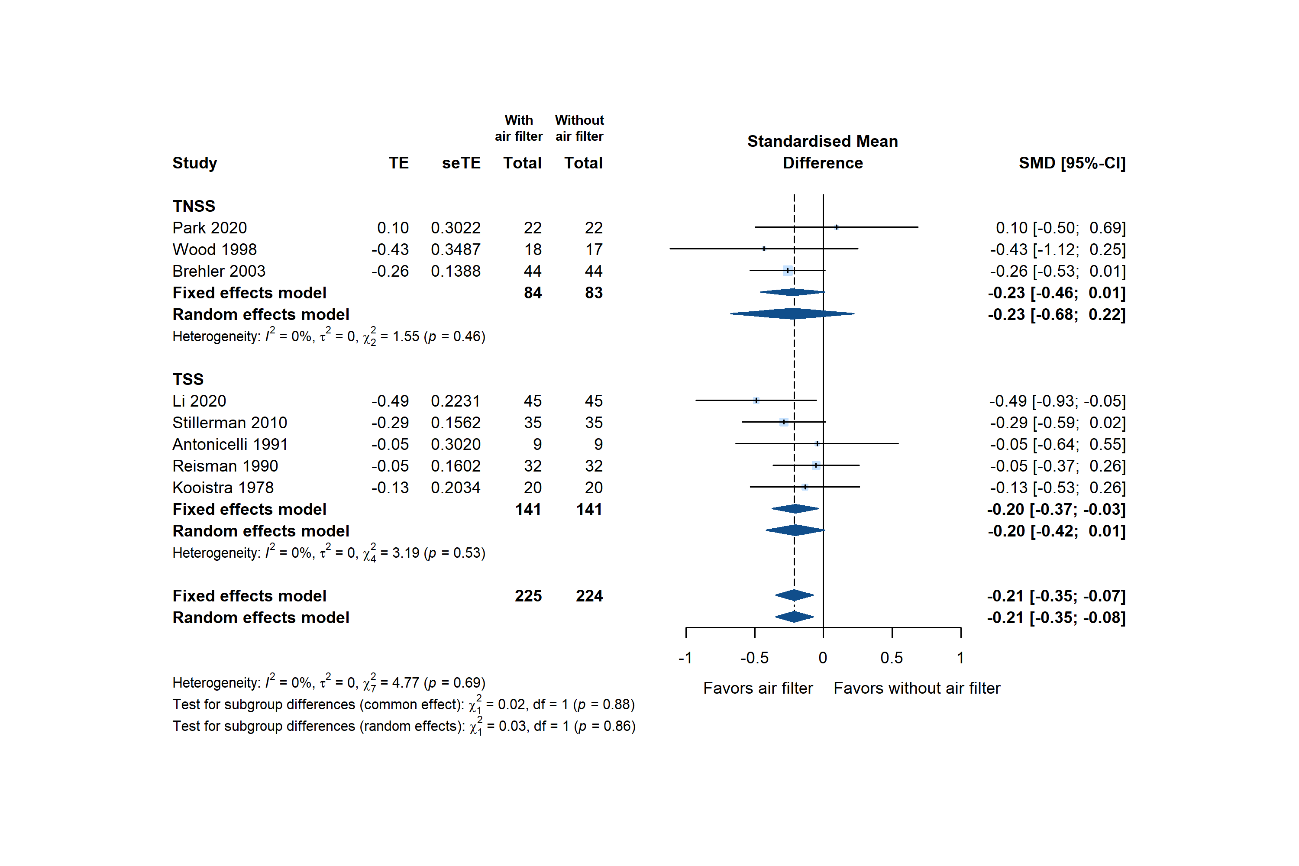


**Figure S7.** Forest plot of subgroup analysis of symptom score pooled with nighttime symptoms in different symptom scores.


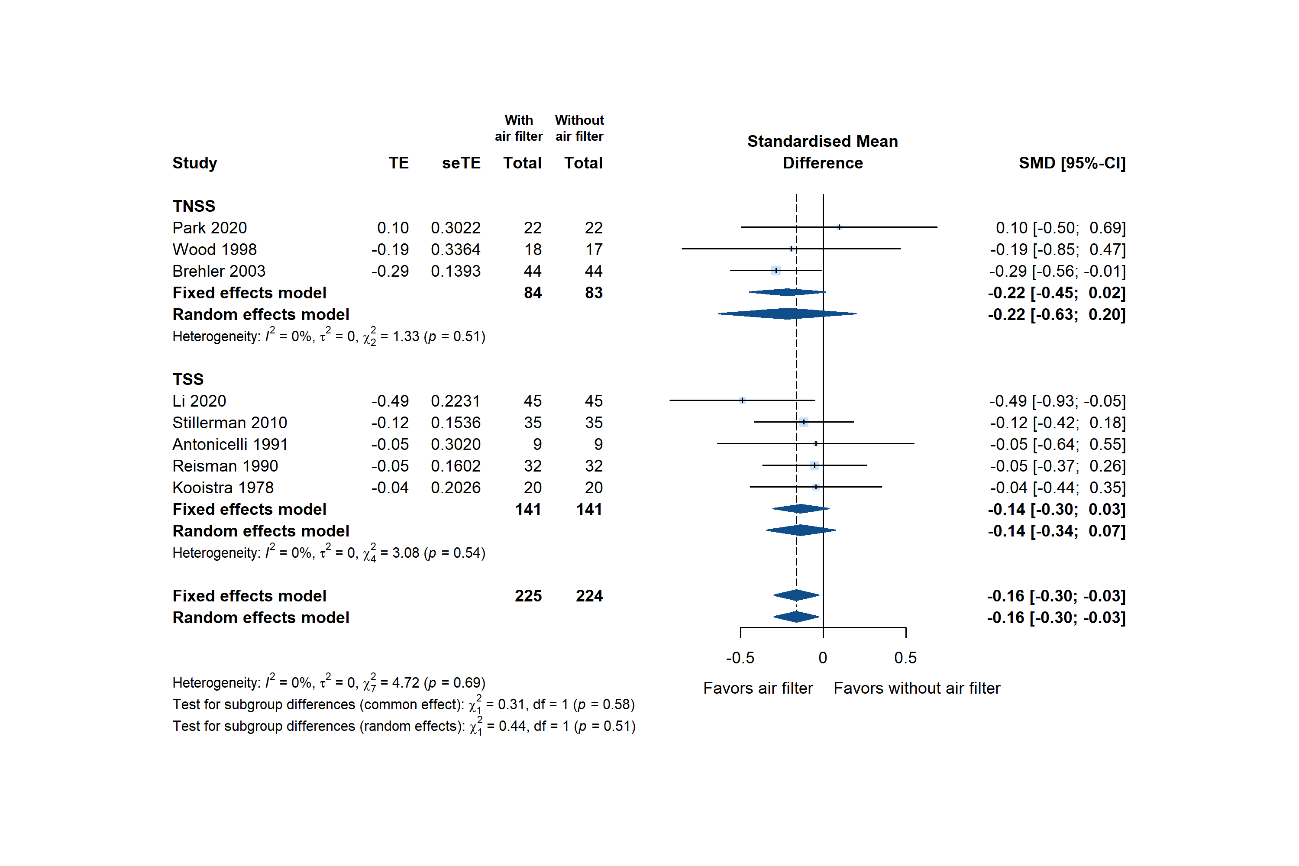


**Figure S8.** Forest plot of subgroup analysis of symptom score pooled with daytime symptoms in different symptom scores.


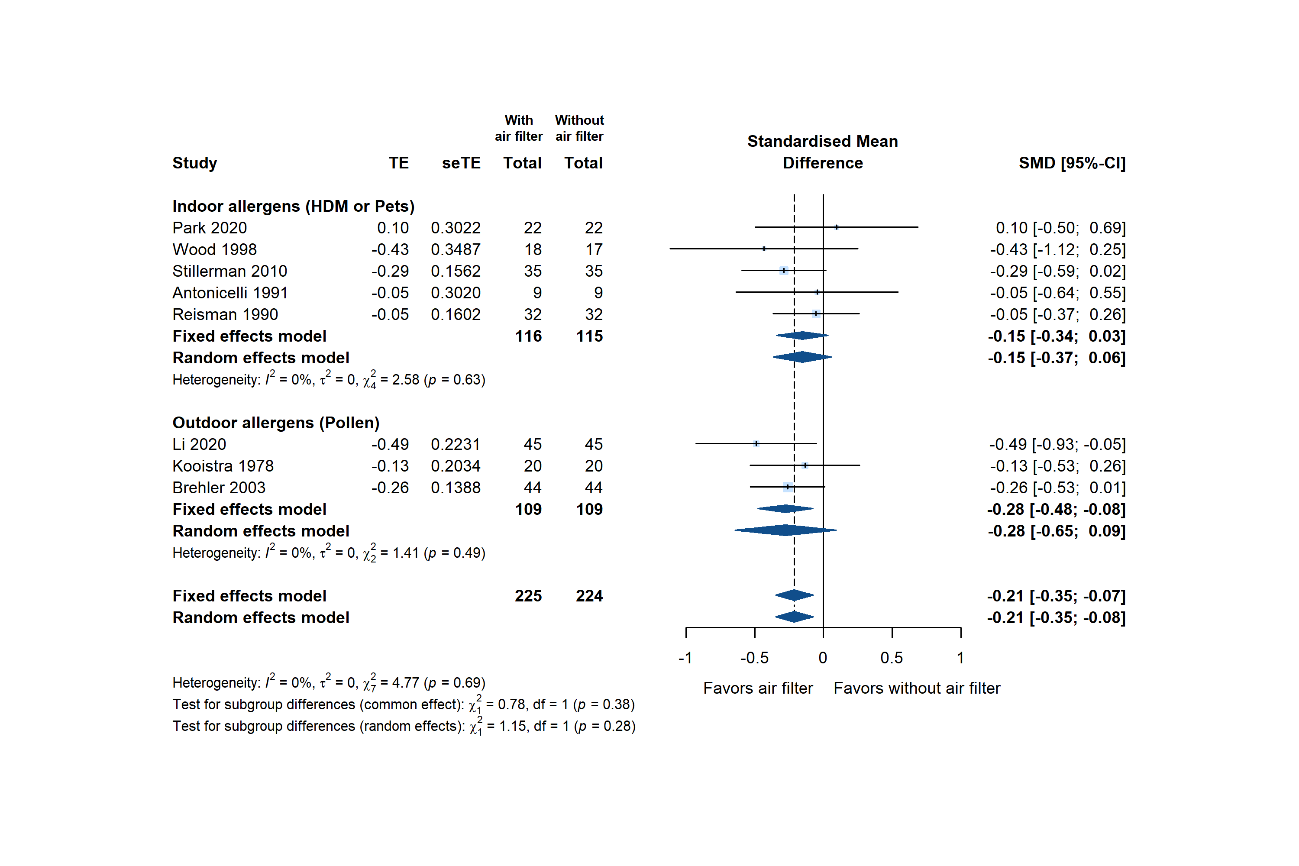


**Figure S9.** Forest plot of subgroup analysis of symptom score pooled with nighttime symptoms in different allergen types.


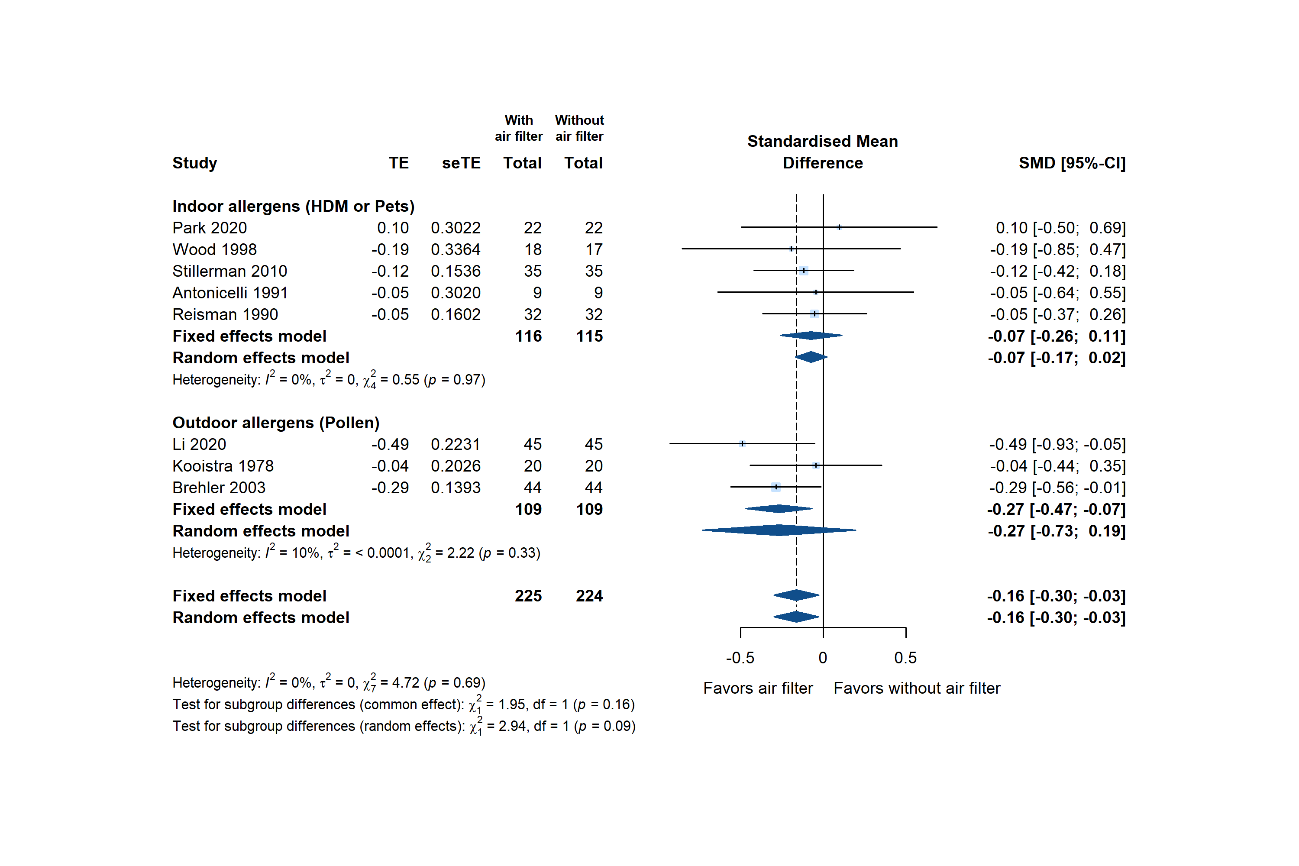


**Figure S10.** Forest plot of subgroup analysis of symptom score pooled with daytime symptoms in different allergen types.


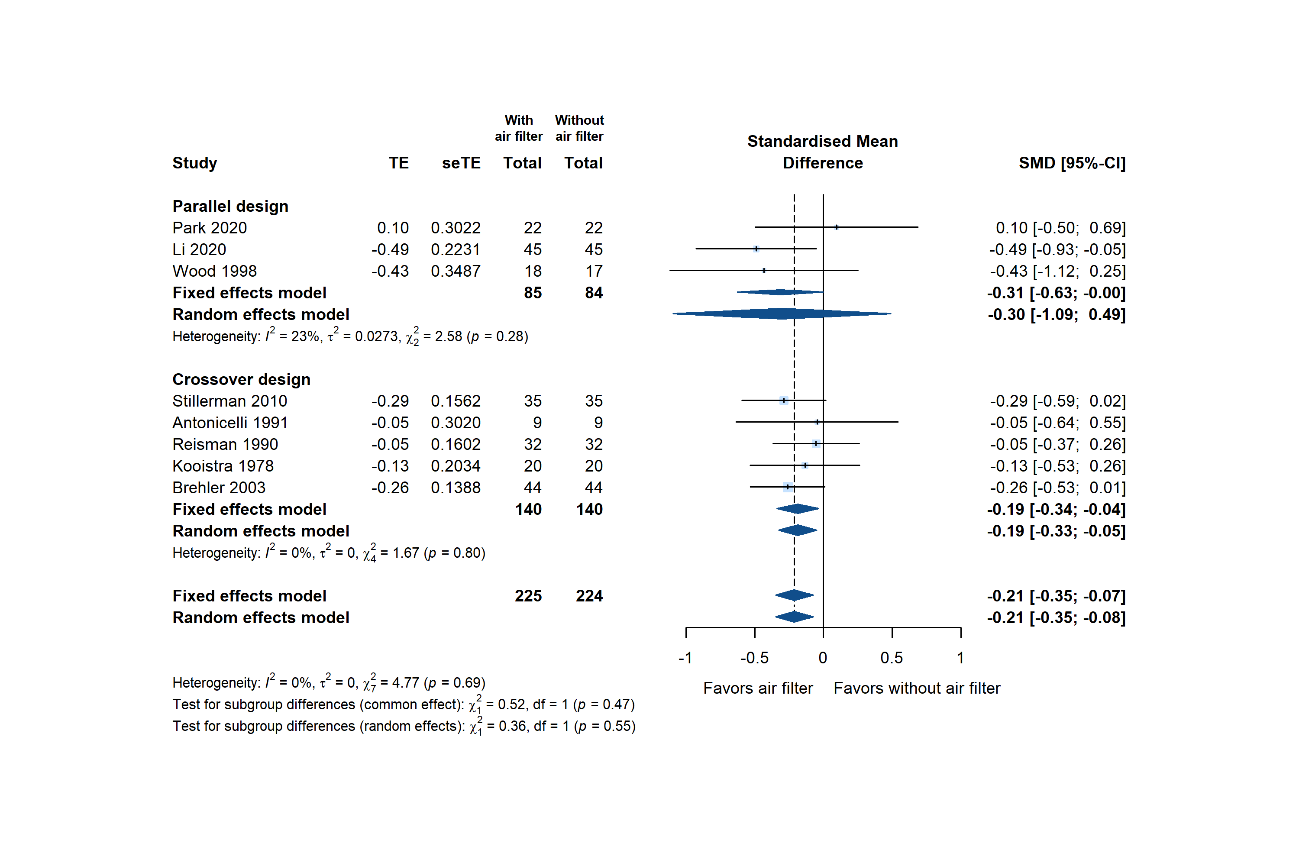


**Figure S11.** Forest plot of subgroup analysis of symptom score pooled with nighttime symptoms in different study design.


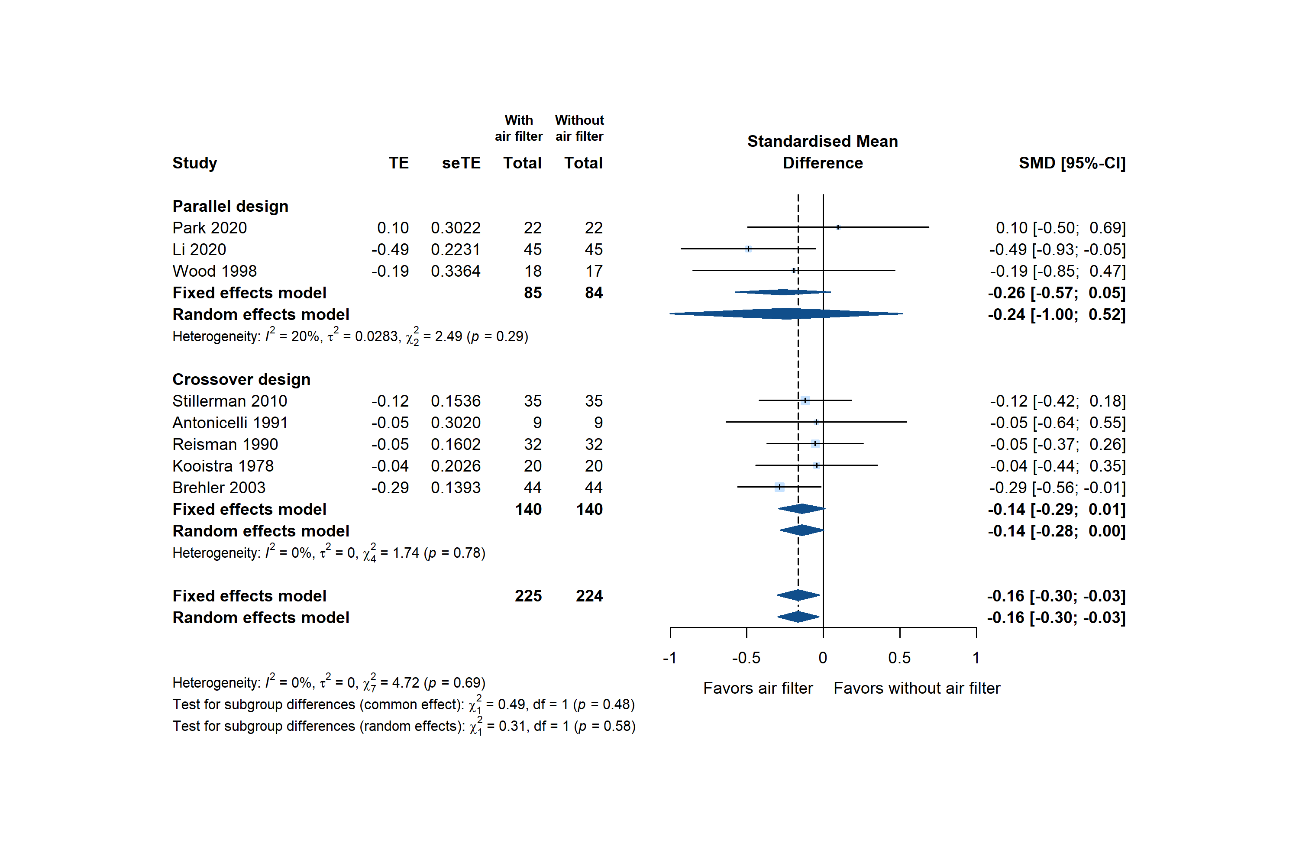


**Figure S12.** Forest plot of subgroup analysis of symptom score pooled with daytime symptoms in different study design.


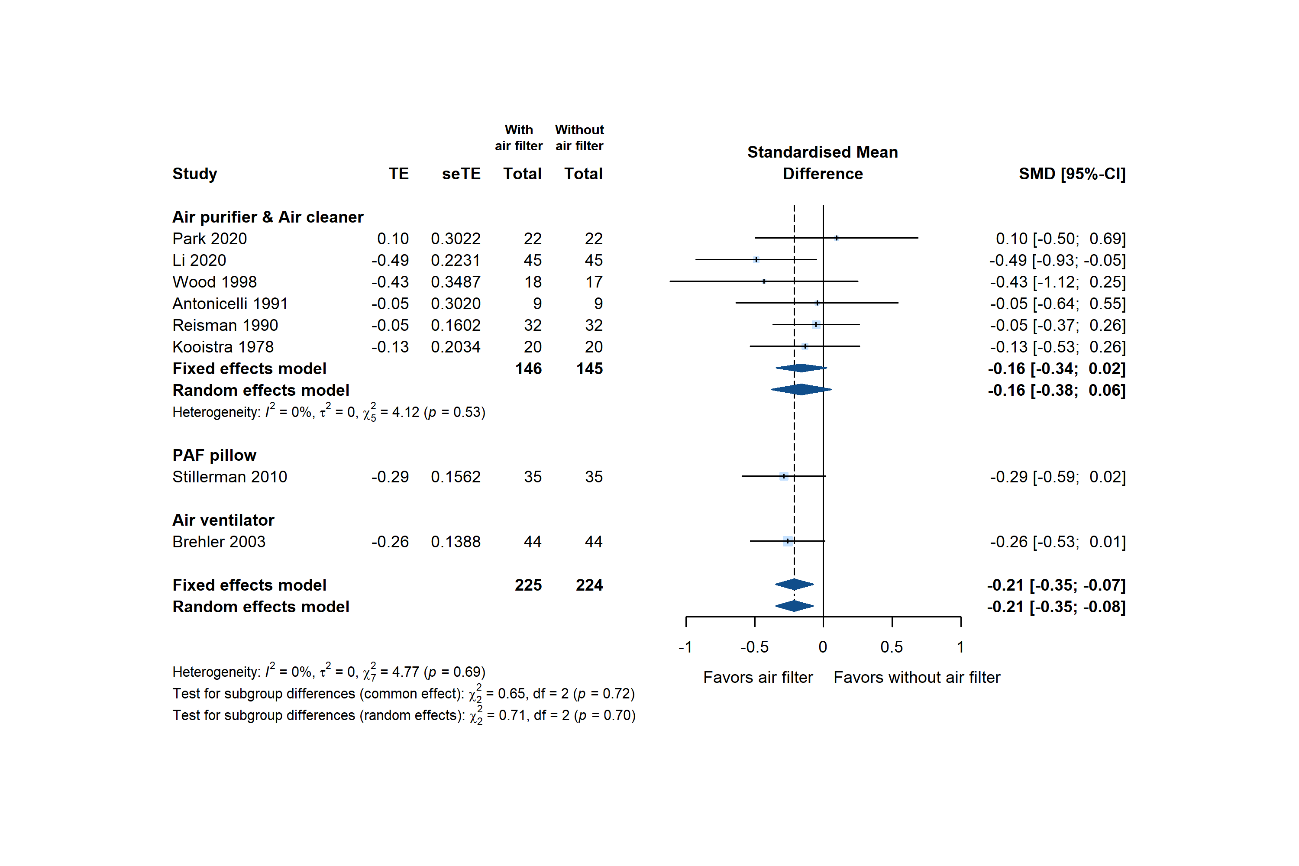


**Figure S13.** Forest plot of subgroup analysis of symptom score pooled with nighttime symptoms in different air filter devices.


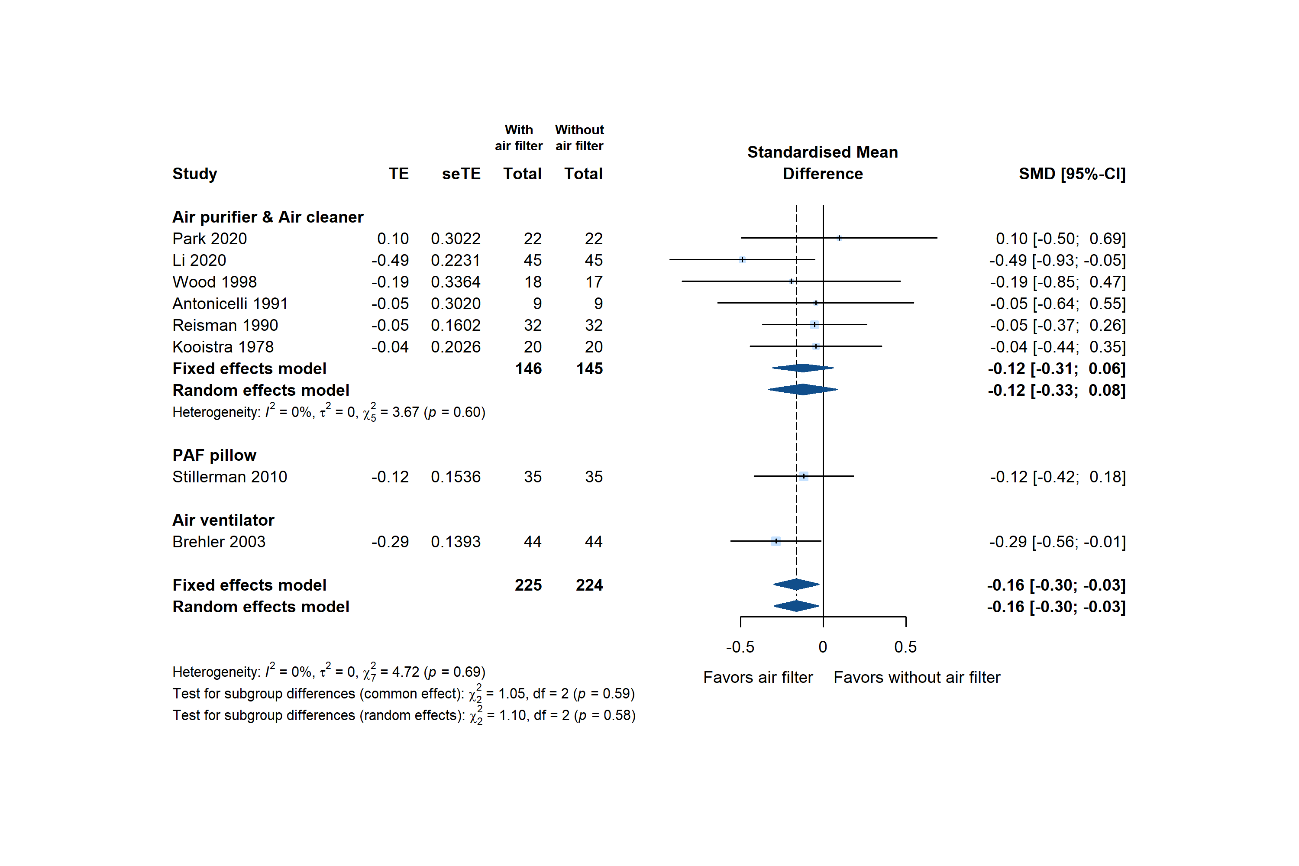


**Figure S14.** Forest plot of subgroup analysis of symptom score pooled with daytime symptoms in different air filter devices.


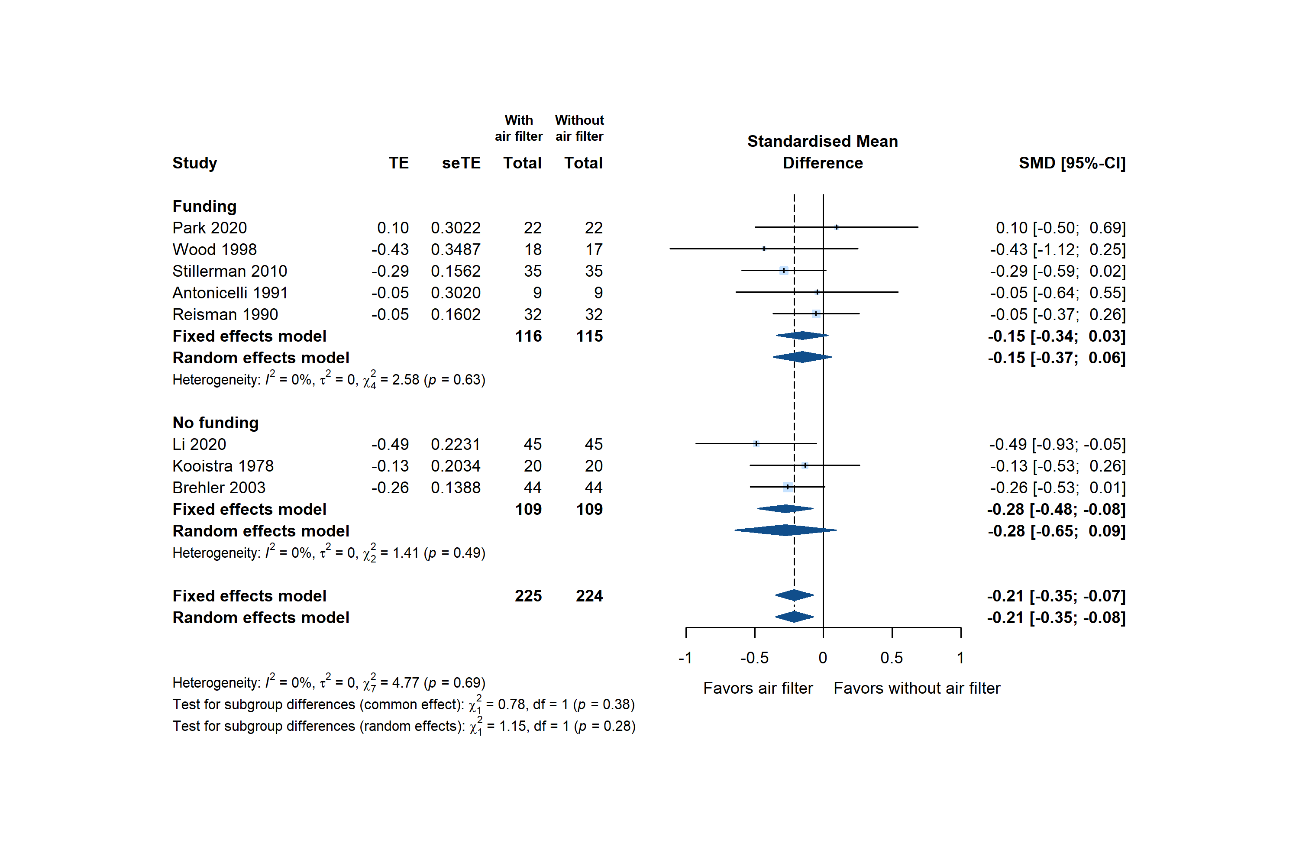


**Figure S15.** Forest plot of subgroup analysis of symptom score pooled with nighttime symptoms with or without funding.


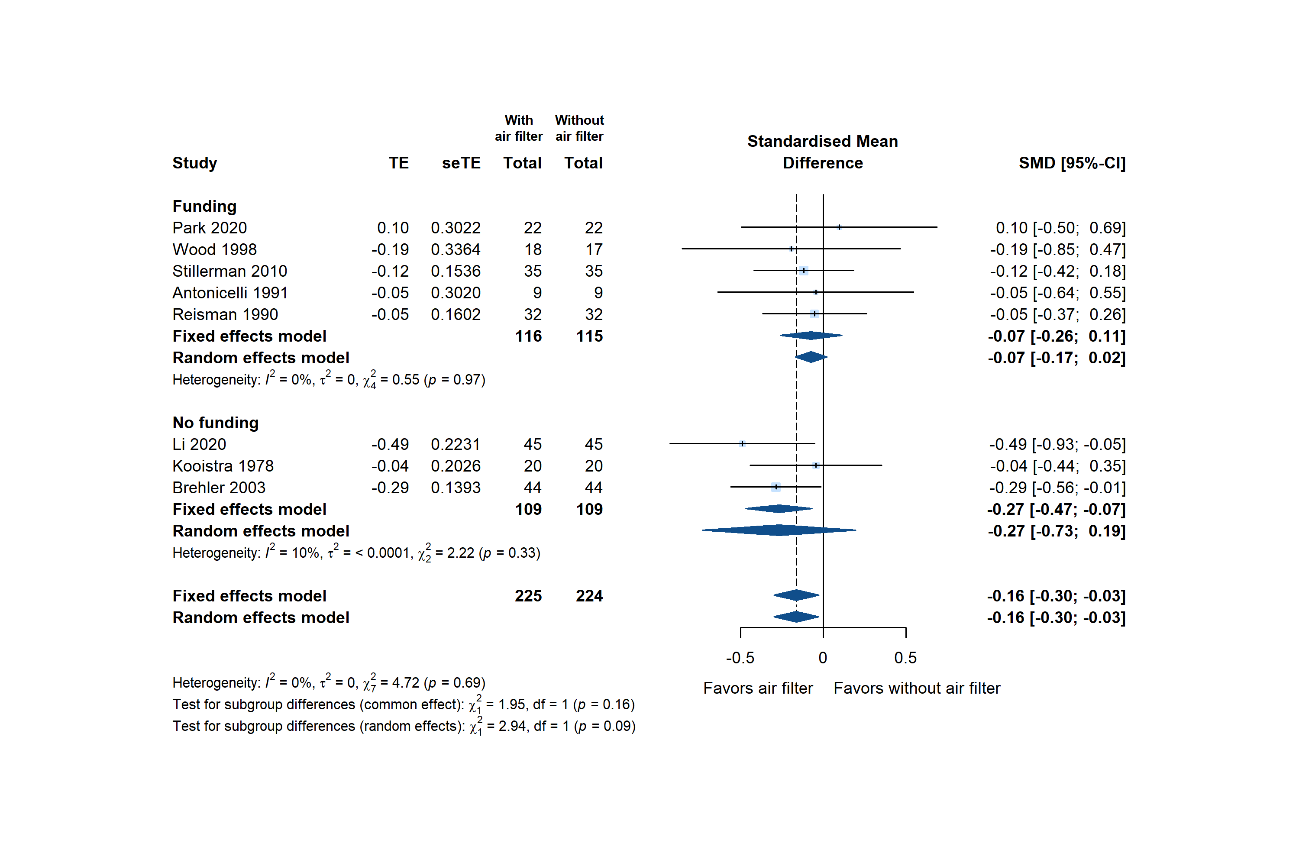


**Figure S16.** Forest plot of subgroup analysis of symptom score pooled with daytime symptoms with or without funding.

## Meta-regression


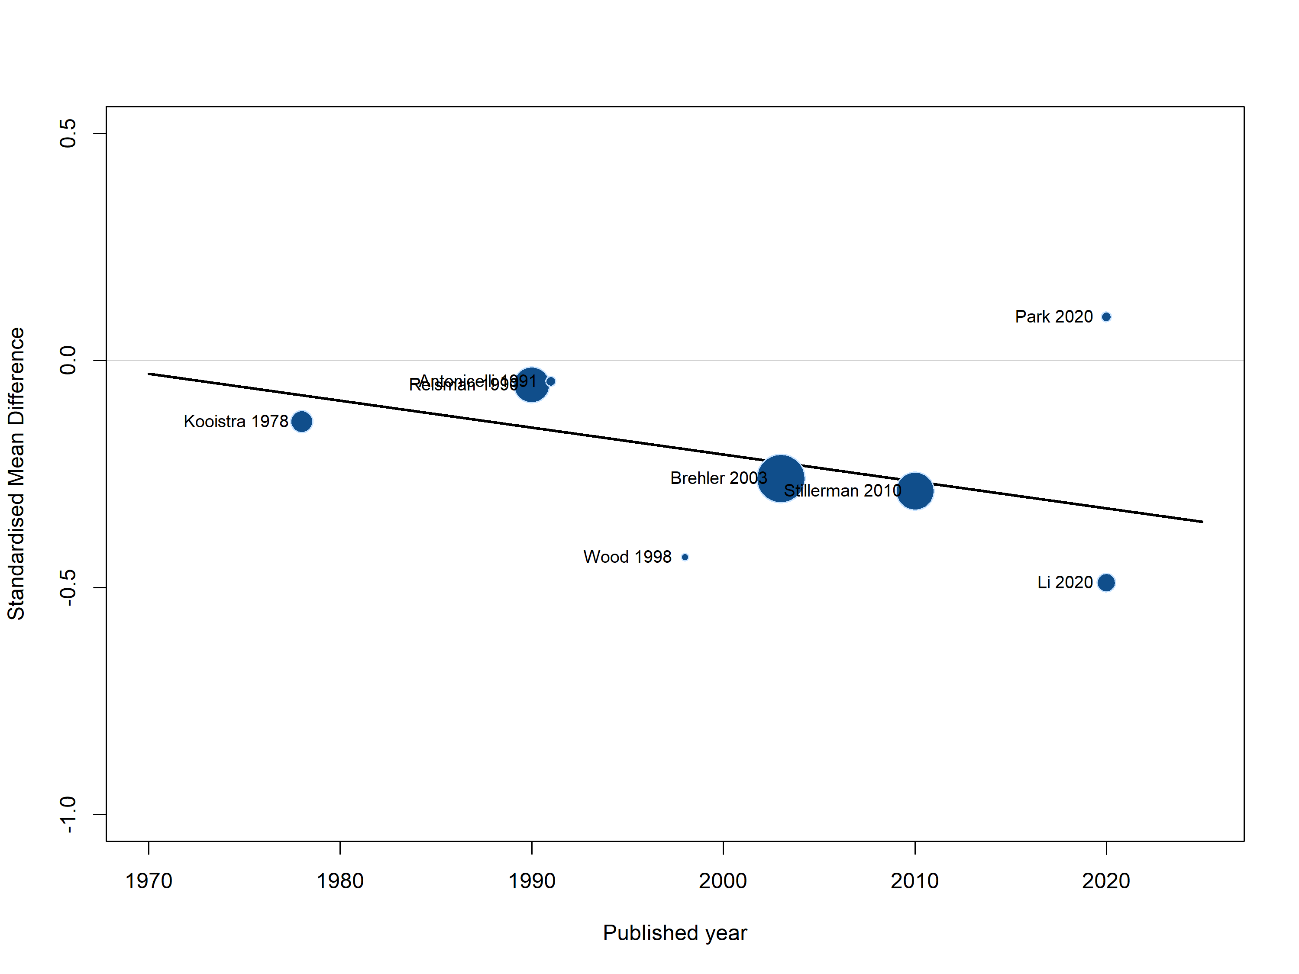


**Figure S17.** Meta-regression on published year. The coefficient was −0.0059 with a *p* value of 0.211.


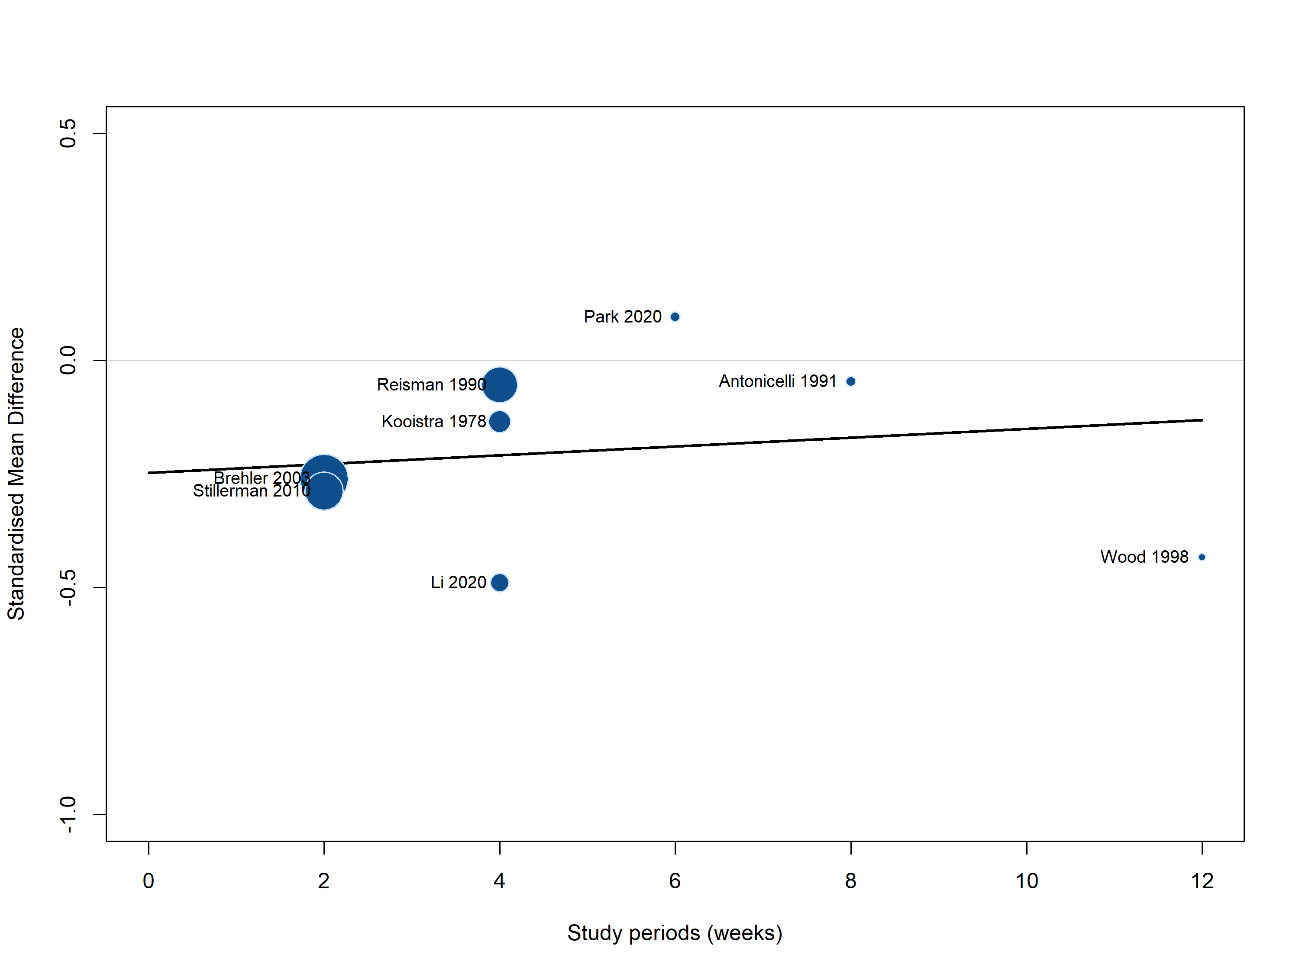


**Figure S18.** Meta-regression on study periods (weeks). The coefficient was 0.0097 with a *p* value of 0.728.


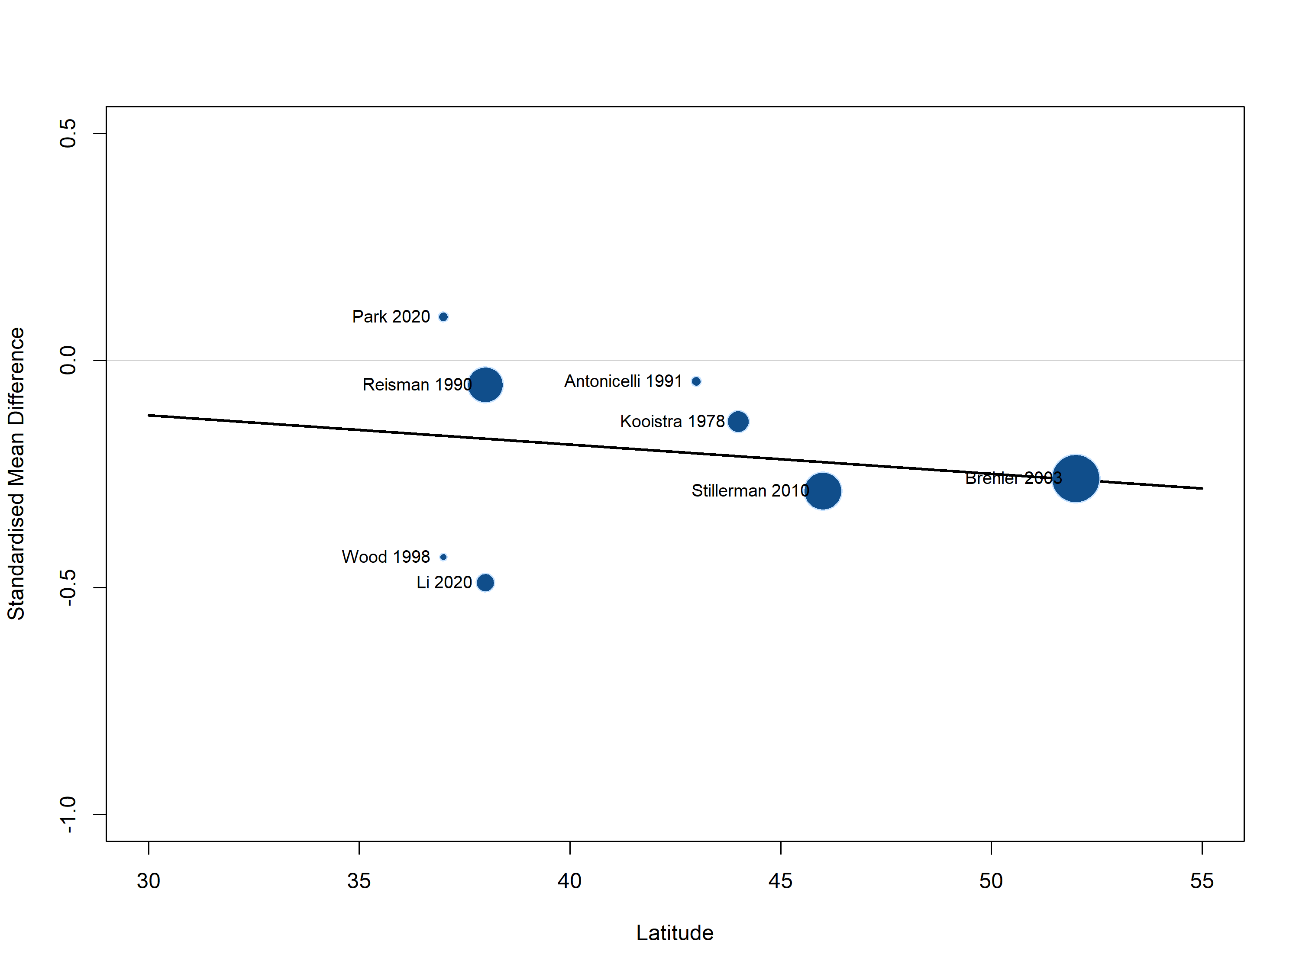


**Figure S19.** Meta-regression on latitude. The coefficient was −0.0065 with a *p* value of 0.567.

## Publication biases


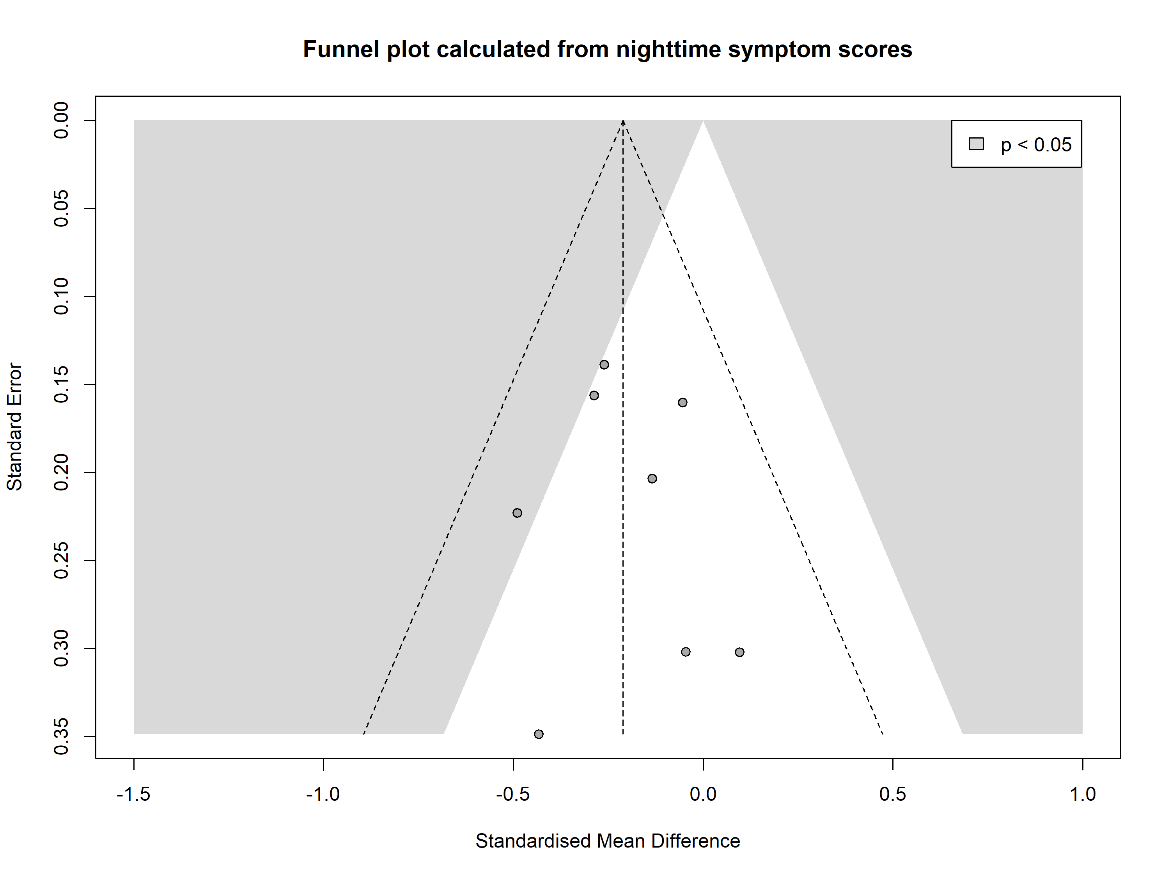


**Figure S20.** The funnel plot in primary outcome calculated from nighttime symptom score of included trials. The *p* value of the Egger's test was 0.817, indicating no potential publication bias.


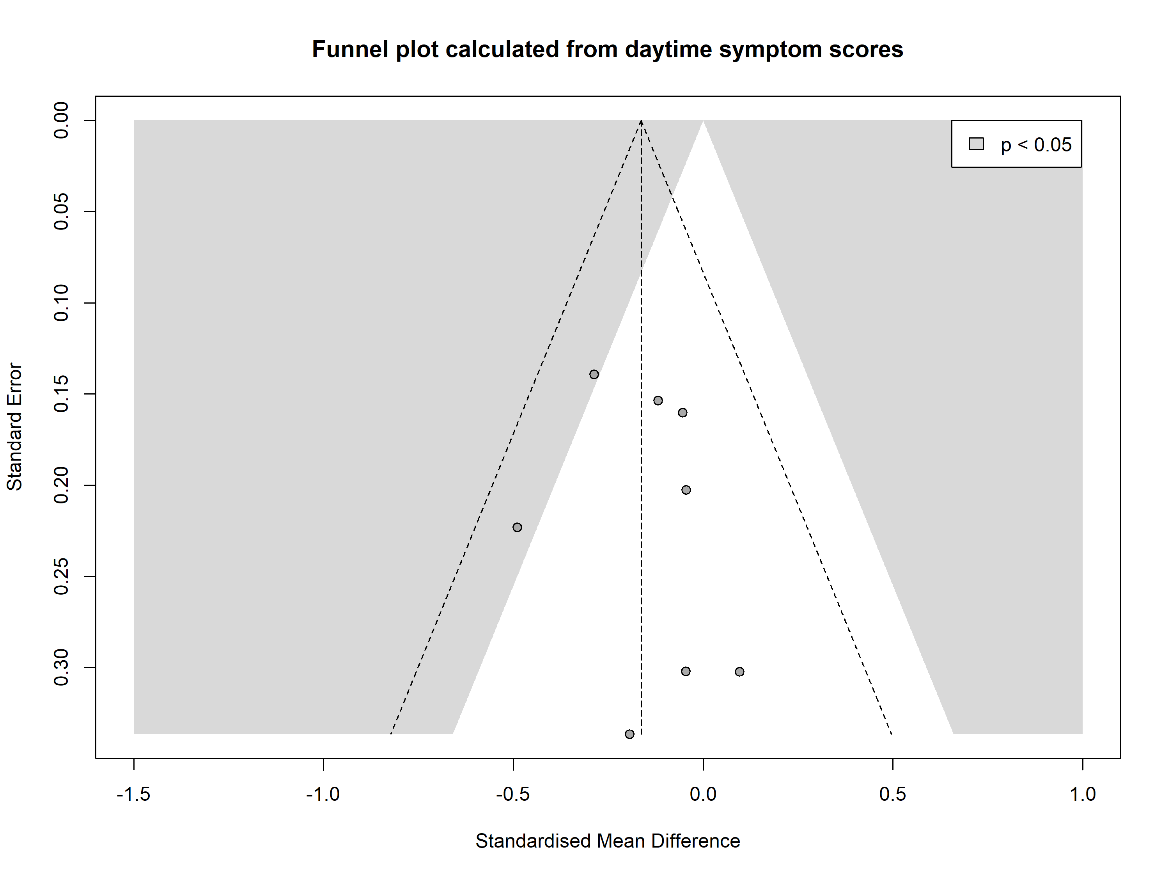


**Figure S21.** The funnel plot in primary outcome calculated from daytime symptom score of included trials. The *p* value of the Egger's test was 0.631, indicating no potential publication bias.
